## Harnessing apomictic reproduction in grasses: what we have learned from *Paspalum*

Juan Pablo A. Ortiz<sup>1,2</sup>, Camilo L. Quarin<sup>1</sup>, Silvina C. Pessino<sup>2</sup>, Carlos Acuña<sup>1</sup>, Eric J. Martínez<sup>1</sup>, Francisco Espinoza<sup>1</sup>, Diego H. Hojsgaard<sup>3</sup>, Maria E. Sartor<sup>1</sup>, Maria E. Cáceres<sup>4</sup> and Fulvio Pupilli<sup>4,\*</sup>

<sup>1</sup>Instituto de Botánica del Nordeste (IBONE-CONICET), Facultad de Ciencias Agrarias, Universidad Nacional del Nordeste, Corrientes, Argentina, <sup>2</sup>Laboratorio de Biología Molecular, Facultad de Ciencias Agrarias, Universidad Nacional de Rosario, Zavalla, Argentina, <sup>3</sup>Albrecht-von-Haller Institute for Plant Sciences, Department of Systematic Botany, Georg-August-University of Göttingen, Göttingen, Germany and <sup>4</sup>CNR-Istituto di Genetica Vegetale, Research Division: Perugia, Via della Madonna alta 130, I-06128 Perugia, Italy

\* For correspondence. E-mail [fulvio.pupilli@igv.cnr.it](mailto:fulvio.pupilli@igv.cnr.it)

Received: 12 December 2012 Returned for revision: 25 February 2013 Accepted: 13 May 2013 Published electronically: 17 July 2013

• **Background** Apomixis is an alternative route of plant reproduction that produces individuals genetically identical to the mother plant through seeds. Apomixis is desirable in agriculture, because it guarantees the perpetuation of superior genotypes (i.e. heterotic hybrid seeds) by self-seeding without loss of hybrid vigour. The *Paspalum* genus, an archetypal model system for mining apomixis gene(s), is composed of about 370 species that have extremely diverse reproductive systems, including self-incompatibility, self-fertility, full sexual reproduction, and facultative or obligate apomixis. Barriers to interspecific hybridization are relaxed in this genus, allowing the production of new hybrids from many different parental combinations. *Paspalum* is also tolerant to various parental genome contributions to the endosperm, allowing analyses of how sexually reproducing crop species might escape from dosage effects in the endosperm.

• **Scope** In this article, the available literature characterizing apomixis in *Paspalum* spp. and its use in breeding is critically reviewed. In particular, a comparison is made across species of the structure and function of the genomic region controlling apomixis in order to identify a common core region shared by all apomictic *Paspalum* species and where apomixis genes are likely to be localized. Candidate genes are discussed, either as possible genetic determinants (including homologs to signal transduction and RNA methylation genes) or as downstream factors (such as cell-to-cell signalling and auxin response genes) depending, respectively, on their co-segregation with apomixis or less. Strategies to validate the role of candidate genes in apomictic process are also discussed, with special emphasis on plant transformation in natural apomictic species.

**Key words:** Apomixis, comparative mapping, molecular markers, *Paspalum*, transcriptomic analysis.

### INTRODUCTION

Modern agriculture is continuously creating new and highly productive cultivars. Traditional plant breeding methods and, more recently, genetic engineering have succeeded in steadily increasing crop production over the years. Despite these achievements, and with a global community calculated to stabilize at 8.1–11.9 billion people in the middle of the 21st century (Lutz *et al.*, 1997), the challenges for agriculture remain overwhelming. Among promising approaches for significantly increasing crop productivity, the transfer of clonal reproduction through seeds or apomixis would represent an enormous benefit for agriculture (Vielle-Calzada *et al.*, 1996). The genus *Paspalum* is an attractive biological system for studying apomixis, because it is both a model system for mining candidate gene(s) and an important target crop. Over the past five decades, a wealth of information has been produced regarding the biology, genetic and reproductive modes of many *Paspalum* species including: (1) cytoembryological aspects of apomixis; (2) detailed molecular maps of apomixis loci; (3) isolation of the first candidate genes; and (4) development of transformation systems for gene delivery. Moreover, *P. notatum* represents an unprecedented occurrence:

the existence of freely crossable apomictic and sexually reproducing races of an agronomically important species.

In sexual reproduction, a single cell within the ovule typically becomes the megaspore mother cell (MMC). The MMC undergoes meiosis to form four reduced megaspores, one of which develops into an embryo sac (ES). In most plants, the ES includes the egg cell and two synergids at one pole, a large binucleated central cell, and three antipodals at the opposite pole. This is known as *Polygonum*-type ES. Double fertilization by two sperm released from the pollen tube results in a diploid zygote ( $n$  egg +  $n$  sperm) and a triploid central cell ( $2n$  central cell +  $n$  sperm) that develops into endosperm (Grossniklaus, 2001). Conversely, gametophytic apomixis in angiosperms relies on the formation of an ES from an unreduced ES initial (Nogler, 1984). Whether unreduced ESs arise from an MMC or from a somatic, usually nucellar cell, distinguishes diplospory from apospory, respectively. Fertilization of polar nuclei is usually required for apomictic seed formation. Both pathways have been broadly referred to as ‘apomeiosis’ or ‘apomeiotic pathways’ and encompass a variety of developmental schemes (Nogler, 1984; Asker and Jerling, 1992; Crane, 2001; Pupilli and Barcaccia, 2012). Apomeiosis was originally defined as

the 'loss of meiotic reduction' (Renner, 1916). In our opinion, the term is not exactly applicable to apospory, because it is derived from the word 'meiosis' and the Greek prefix  $\alpha\pi\omicron$  (apo), meaning away from, without or lacking. The term apomeiosis applies to diplospory, which involves a loss of meiosis. However, in apospory, somatic cells acquire a novel ability to develop ESs, a function normally reserved for the megaspores, whereas meiosis usually occurs in the MMC. The functional megaspore aborts or develops into a meiotic ES that usually loses functionality in competition with the aposporous sacs developing in the same ovule. Nowadays, these pathways are viewed as heterochronic traits resulting from the ectopic expression of sexual reproduction sub-programmes either temporally or spatially (Grimanelli *et al.*, 2003; Bradley *et al.*, 2007; Sharbel *et al.*, 2010).

## PASPALUM AGAMIC COMPLEXES

### Botany, phylogeny and evolution

*Paspalum* (Linnaeus, 1759) is one of the ten largest genera within Poaceae. Recent systematic works have expanded the genus, including species of the genus *Thrasya* (Denham, 2005), and new taxa have been described (Oliveira and Rua, 2005; Rua *et al.*, 2008; Oliveira and Valls, 2009; Sánchez-Ken, 2010; Ramos *et al.*, 2011). In addition, several species have been transferred to *Paspalum* from the polyphyletic genus *Panicum* (Morrone *et al.*, 2007, 2008; Zuloaga *et al.*, 2007, 2010, 2011; Sede *et al.*, 2008, 2009). With a wide range of morphological and ecological adaptations, the approx. 370 species of *Paspalum* have been classified into four subgenera.

- (1) *Anachyris* (Nees) Chase, a well-delimited monophyletic group of six closely related species sharing specific morphological and embryological features (Morrone *et al.*, 2000; Urbani *et al.*, 2002; Hojsgaard *et al.*, 2008; Rua *et al.*, 2010).
- (2) *Ceresia* (Pers.) Rchb., 25 species mainly characterized by bearing a winged rachis (Denham *et al.*, 2002).
- (3) *Harpostachis* (Trin.) S. Denham (formerly genus *Thrasya*), 40 species distributed in Central America and northern South America (Denham, 2005; Sánchez-Ken, 2010).
- (4) *Paspalum sensu stricto*, which contains most of the species (approx. 300), and shows the greatest diversity (Zuloaga and Morrone, 2005).

The two most comprehensive taxonomic reviews recognized 40 infrageneric groups among these subgenera (Chase, 1939; Zuloaga and Morrone, 2005). Considerable taxonomic efforts have been devoted to the genus *Paspalum*, especially regarding infrageneric classification (Rua *et al.*, 2010). Current phylogenetic analyses using morphological and/or genetic data have better clarified relationships within the genus (Denham *et al.*, 2002; Souza-Chies *et al.*, 2006; Denham and Zuloaga, 2007; Essi and Souza-Chies, 2007). However, the molecular relationships did not reflect morphological data as only the subgenus *Anachyris* formed a well-supported clade (Denham and Zuloaga, 2007; Rua *et al.*, 2010). Moreover the informal groups in *Paspalum* subgenus *Paspalum* have not yet been delimited by molecular tools, and most of them cannot be diagnosed exclusively by morphological synapomorphies

(Souza-Chies *et al.*, 2006). Recent phylogenetic analyses using molecular data have confronted their composition, and no uniform criteria of classification have been achieved to date (Giussani *et al.*, 2009; Rua *et al.*, 2010). Further studies based on extensive taxon sampling and an adequate number of informative molecular markers are therefore needed to resolve relationships among both subgenera and informal groups.

*Paspalum* species occupy diverse habitats in North and South America, while a few species are native to Africa, Asia and Oceania, and only three or four are cosmopolitan. The centre of origin for the genus is tropical South America (Chase, 1939; Nicora and Rúgolo de Agrasar, 1987; Judziewicz, 1990), but secondary centres of diversity have been recognized in the Brazilian cerrados and the campos of Argentina, Uruguay and Southern Brazil (Zuloaga and Morrone, 2005). The wide range of ecological adaptations found in the genus (Chase, 1939; Parodi, 1969; Zuloaga and Morrone, 2005; L. R. Parodi and E. G. Nicora, unpubl. res.) is probably related to the various reproductive strategies (i.e. sexual reproduction, auto- and allogamy, clonal reproduction through apomixis and vegetative propagation) and ploidy levels found within and across the species (Quarin, 1992). This has undoubtedly affected the evolutionary success of the genus (Bashaw *et al.*, 1970). The observation that the three most diverse subfamilies of Poaceae have the highest proportions of genera that combine apomictic and sexual reproductive modes (i.e. 13.03 % in Panicoideae, 8.27 % in Chloridoideae and 5.29 % in Pooideae; Fig. 1) suggests that apomixis in *Paspalum* species was probably a key factor in their diversification through the formation of both intra- and interspecific agamic complexes with special evolutionary properties. Contrary to the classical view of the agamic complexes being closed systems (Stebbins, 1950), Carman (1997) pointed out that apomixis is a transitional evolutionary state of polyploid complexes (transition theory). In *Paspalum*, these complexes usually form spatially restricted diploid populations that represent the main source of variability and that co-habit and hybridize with polyploids (Urbani *et al.*, 2002; Daurelio *et al.*, 2004; Speranza, 2009). Polyploids exploit the advantages of apomixis, i.e. uniparental reproduction and clonality, to expand their geographical and ecological ranges (Kearney, 2005; Hörandl, 2006). Recently, Hörandl and Hojsgaard (2012) extended the transition theory to include the possibility of reversals from facultative apomixis to obligate sexuality. In *Paspalum*, a few species exhibit the features of a typical genetic system, but with higher ploidy levels (i.e. *P. durifolium* and *P. ionanthum*; see Table 1) and may represent cases of reversals forming new agamic complexes after second rounds of polyploidization. Under these assumptions, the morphologically diverse and species-rich genus *Paspalum* can be considered – according to Hörandl and Hojsgaard (2012) – as a typical evolutionary outcome of sexual–apomictic multiploid complexes within the main clades of Poaceae.

The two main *Paspalum* species used as models for apomixis research, *P. notatum* and *P. simplex*, form agamic complexes made up of diploid sexual and autopolyploid apomictic individuals. Interestingly for molecular approaches toward gene isolation, DNA content values for these two species are among the smallest within the Poaceae tribe: 1C = 0.58 pg for diploid *P. notatum* (Jarret *et al.*, 1995) and 1C = 0.75 pg for diploid *P. simplex* (Cáceres *et al.*, 1999).

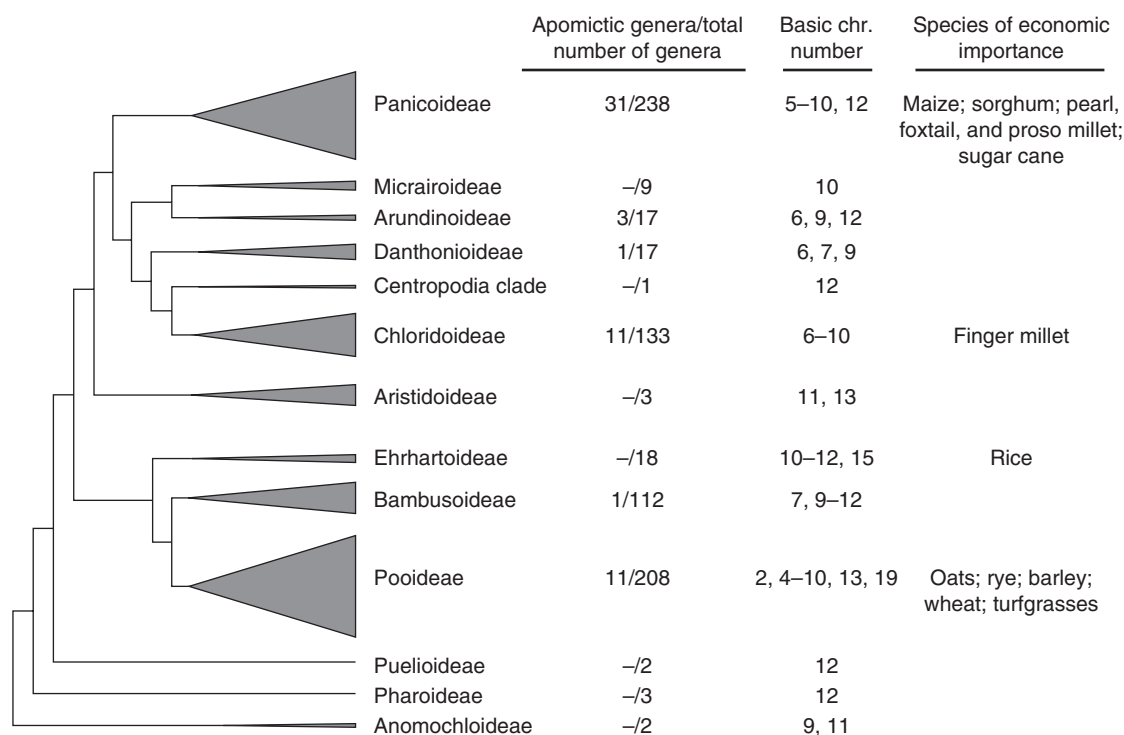

FIG. 1. Phylogenetic tree of Poaceae subfamilies (modified after Grass Phylogeny Working Group II, 2012); the sizes of subfamilial clades are relative to the species richness of each clade. The number of apomictic genera is after Carman (1997) and Hörandl and Hojsgaard (2012). The total number of genera is according to the World-Wide Phylogenetic Classification of Poaceae database (Stevens, 2001 onwards). Chromosome (chr.) numbers were collected from the Grass Genera of the World database (<http://www.biologie.uni-hamburg.de/b-online/delta/grass/index.htm>). Economically important species inside each subfamily are indicated.

### Cytology and reproduction

As highlighted above, the grass genus *Paspalum* is characterized by an extremely versatile genetic system due to extensive variation in chromosome number, meiotic chromosome behaviour and reproductive mode. Based on taxonomical reviews, the main components of the genetic system have been examined for approx. 20 % of all *Paspalum* species (e.g. Chase, 1939; Zuloaga and Morrone, 2005; Williams *et al.*, 2011). From the compilation data presented in Table 1, most species are polyploids (75 %), out of which some form multiploid complexes.

Sexuality in *Paspalum* species is typical for that of most angiosperms and is characterized by the double fertilization of a reduced ES of the *Polygonum* type, typically composed of the egg apparatus (egg cell and two synergids), a large two-nucleated central cell and a mass of proliferated antipodals at the chalazal end (Quarin, 1992). Apomictic reproduction is mainly of the aposporous type, according to which unreduced ESs differentiate from particular nucellar cells, so-called aposporous initials (AIs). Typically, three or the four spores of the legitimate MMC degenerate and several nucellar cells change their fate and differentiate into AIs (Fig. 2A, B). Aposporous ES development is achieved through an unstable pattern of cell division and cell differentiation. A first mitosis of the AI nucleus produces a binucleate ES whose further development varies according to the number of both divisions and nuclei involved. Consequently, mature ESs always contains an egg cell and a binucleate central cell, though one or two synergids may often be observed beside the egg cell; antipodal cells are always absent in this so-called *Paspalum* type of aposporous ES (Fig. 2C, D;

Burson and Bennett, 1970a, 1971; Quarin *et al.*, 1996; Espinoza *et al.*, 2001; Ma *et al.*, 2004).

Apart from the aposporous *Paspalum* type, the *Taraxacum* type of diplospory was reported for two Asian species, *P. commersonii* Lam. (= *P. scrobiculatum* L.;  $2n = 6x$ ) and *P. longifolium* Roxb. ( $2n = 4x$ ), and for the pantropical species *P. conjugatum* Berg. ( $2n = 4x$ ) (Chao, 1974, 1980). *Hieracium*-type ES development has been described in only two species of *Paspalum*, *P. secans* Hitchc. & Chase (Snyder, 1957) and *P. simplex* Morong (Caponio and Quarin, 1987; Cáceres *et al.*, 2001), while both aposporous and diplosporous types were detected in *P. minus* E. Fourn. (Bonilla and Quarin, 1997) and *P. scrobiculatum* L. (Chao, 1974).

Microsporogenesis consists of the meiotic division of the male archesporium that gives rise to an array of four cells (tetrad) each containing a nucleus with a reduced chromosome number. Then the nucleus of each microspore moves to the side wall before mitosis I starts, giving rise to the microgametogenesis process. This mitosis involves an unequal cell division, producing a large vegetative cell and a small generative cell having a nucleus with condensed chromatin structure. The generative cell divides into two sperm cells via mitosis II. The mature male gametophyte consists of a tricellular pollen with two sperm cells, plus a vegetative cell. It is now widely accepted that apomixis in *Paspalum* is always associated with irregular male meiosis in the forms of multivalent chromosome associations (mainly the presence of quadrivalents), asynapsis or desynapsis, the whole genome lasting unpaired, or appearance of chromosome bridges and micronuclei (Quarin, 1992; Table 1).

TABLE 1. *Cytology and reproductive modes in Paspalum spp.*

| Specie                                  | Ploidy level | Meiosis* | Reproductive mode <sup>†</sup> | References                                                                                                         | Referred to as                                            |
|-----------------------------------------|--------------|----------|--------------------------------|--------------------------------------------------------------------------------------------------------------------|-----------------------------------------------------------|
| <i>P. alnum</i> Chase                   | 2x           | R        | S ss                           | Quarin and Hanna (1980b)                                                                                           | <i>P. hexastachyum</i> Parodi                             |
|                                         | 4x           | mca      | Ap                             | Burson (1975)                                                                                                      |                                                           |
| <i>P. arundinellum</i> Mez              | 4x           | mca      | Ap                             | Bashaw <i>et al.</i> (1970)                                                                                        | <i>P. alcalinum</i> Mez                                   |
| <i>P. atratum</i> Swallen               | 4x           | mca      | Ap                             | Quarin <i>et al.</i> (1997)                                                                                        |                                                           |
| <i>P. bertonii</i> Hack.                | 2x           | R        | S ss                           | Quarin and Burson (1991)                                                                                           |                                                           |
| <i>P. buckleyanum</i> Vasey             | 2x           | R        | S sf                           | Burson (1997)                                                                                                      |                                                           |
|                                         | 4x           | mca      | Ap                             | Burson (1997)                                                                                                      | <i>P. alcalinum</i> Mez                                   |
|                                         | 5x           | mca      | Ap                             | Burson (1997); Sartor <i>et al.</i> (2011)                                                                         |                                                           |
|                                         | 6x           |          | Ap                             | Sartor <i>et al.</i> (2011)                                                                                        |                                                           |
| <i>P. chaseanum</i> Parodi              | 2x           | R        | S ss                           | Espinoza and Quarin (1997)                                                                                         | <i>P. platyphyllum</i> Schult.                            |
| <i>P. chacoense</i> Parodi              | 2x           | R        | S                              | Burson (1985)                                                                                                      |                                                           |
| <i>P. compressifolium</i> Swallen       | 2x           | R        | S ss                           | Quarin <i>et al.</i> (1996)                                                                                        |                                                           |
|                                         | 4x           | mca      | Ap                             | Quarin <i>et al.</i> (1996)                                                                                        |                                                           |
|                                         | 6x           | mca      | Ap                             | Quarin <i>et al.</i> (1996)                                                                                        | <i>P. guaraniticum</i> Parodi                             |
| <i>P. conjugatum</i> P.J. Bergius       | 4x           | asy      | Dp                             | Chao (1980); Ma <i>et al.</i> (2009)                                                                               |                                                           |
| <i>P. conspersum</i> Schrad.            | 4x           | mca      | S                              | Burson and Bennett (1976)                                                                                          |                                                           |
|                                         | 6x           | R        | S                              | Bashaw <i>et al.</i> (1970)                                                                                        | <i>P. guaraniticum</i> Parodi                             |
|                                         | –            | R        | S                              | Quarin and Hanna (1980a)                                                                                           |                                                           |
| <i>P. coryphaeum</i> Trin.              | 2x           | R        | S                              | Quarin and Urbani (1990)                                                                                           |                                                           |
|                                         | 4x           | mca      | Ap                             | Burson (1975); Quarin and Urbani (1990)                                                                            | <i>P. guaraniticum</i> Parodi                             |
| <i>P. cromyorrhizon</i> Trin.           | 2x           | R        | S ss + App                     | Quarin <i>et al.</i> (1982)                                                                                        |                                                           |
|                                         | 4x           | mca      | Ap                             | Bashaw <i>et al.</i> (1970); Burson and Bennett (1971); Quarin <i>et al.</i> (1982); Martínez <i>et al.</i> (1999) |                                                           |
| <i>P. dasyleurum</i> Kunze ex Desv.     | 4x           | R        | S sf                           | Quarin and Caponio (1995)                                                                                          | <i>P. guaraniticum</i> Parodi                             |
| <i>P. dedecae</i> Quarin                | 4x           | mca      | Ap                             | Quarin and Burson (1991)                                                                                           |                                                           |
| <i>P. densum</i> Poir.                  | 2x           | R        | S ss + App                     | Caponio and Quarin (1993)                                                                                          |                                                           |
| <i>P. denticulatum</i> Trin.            | 2x           | –        | S                              | Sartor <i>et al.</i> (2011)                                                                                        |                                                           |
|                                         | 3x           | –        | Ap                             | Sartor <i>et al.</i> (2011)                                                                                        | <i>P. guaraniticum</i> Parodi                             |
|                                         | 4x           | mca      | Ap                             | Sartor <i>et al.</i> (2011); Quarin and Burson (1991)                                                              |                                                           |
| <i>P. dilatatum</i> Poir                | 4x           | R        | S                              | Bashaw and Holt (1958)                                                                                             |                                                           |
|                                         | 5x           | I        | Ap                             | Bashaw and Holt (1958)                                                                                             |                                                           |
|                                         | 6x           | R        | Ap                             | Burson <i>et al.</i> (1991)                                                                                        |                                                           |
|                                         | 6x           | I        | Ap                             | Burson <i>et al.</i> (1991)                                                                                        |                                                           |
|                                         | 6x           | asy      | Ap                             | Burson <i>et al.</i> (1991)                                                                                        |                                                           |
|                                         | –            | –        | Ap                             | Brown and Emery (1958)                                                                                             |                                                           |
| <i>P. distichum</i> L.                  | 4x           | R        | Ap                             | Quarin and Burson (1991); Ma <i>et al.</i> (2009)                                                                  | <i>P. arechavaletae</i> Hack. ex Arechav.                 |
|                                         | 6x           | mca      | Ap                             | Bashaw <i>et al.</i> (1970); Quarin and Burson (1991)                                                              |                                                           |
| <i>P. durifolium</i> Mez                | 4x           | R        | S ss + App                     | Quarin (1994)                                                                                                      | <i>P. arechavaletae</i> Hack. ex Arechav.                 |
|                                         | 6x           | R        | Ap                             | Burson (1985)                                                                                                      |                                                           |
| <i>P. equitans</i> Mez                  | 2x           | R        | S ss + App                     | Quarin and Norrmann (1987)                                                                                         |                                                           |
| <i>P. exaltatum</i> J.Presl.            | 4x           | R        | Ap                             | Burson and Bennett (1971)                                                                                          | <i>P. arechavaletae</i> Hack. ex Arechav.                 |
| <i>P. falcatum</i> Ness ex Steud.       | 4x           | mca      | Ap                             | Burson (1997)                                                                                                      |                                                           |
| <i>P. fasciculatum</i> Willd. ex Flügge | 2x           | R        | S ss                           | Urbani (1996)                                                                                                      |                                                           |
| <i>P. glaucescens</i> Hack.             | 2x           | R        | S ss                           | Pritchard (1962)                                                                                                   |                                                           |
| <i>P. guenoarum</i> Arechav.            | 4x           | mca      | Ap                             | Bashaw <i>et al.</i> (1970); Pritchard (1970); Espinoza <i>et al.</i> (2001)                                       | <i>P. yaguaronense</i> Henrard<br><i>P. rojasii</i> Hack. |
|                                         |              |          |                                | Burson and Bennett (1971)                                                                                          |                                                           |
| <i>P. hartwegianum</i> E. Fourn.        | –            | –        | Ap                             | Brown and Emery (1958)                                                                                             | <i>P. yaguaronense</i> Henrard<br><i>P. rojasii</i> Hack. |
| <i>P. haumanii</i> Parodi               | 2x           | R        | S ss + App                     | Norrmann <i>et al.</i> (1989)                                                                                      |                                                           |
|                                         | 4x           | mca      | Ap                             | Burson (1975); Norrmann <i>et al.</i> (1989)                                                                       |                                                           |
| <i>P. inaequivalve</i> Raddi            | 6x           | R        | S sf                           | Quarin and Burson (1991)                                                                                           | <i>P. yaguaronense</i> Henrard<br><i>P. rojasii</i> Hack. |
| <i>P. indecorum</i> Mez                 | 2x           | R        | S                              | Quarin and Burson (1983)                                                                                           |                                                           |
| <i>P. intermedium</i>                   | 2x           | R        | S ss + App                     | Burson and Bennett (1970); Norrmann <i>et al.</i> (1989)                                                           |                                                           |
|                                         |              |          |                                | Norrmann <i>et al.</i> (1989)                                                                                      |                                                           |
| Munro ex Morong & Britton               | 4x           | mca      | Ap                             | Norrmann <i>et al.</i> (1989)                                                                                      | <i>P. yaguaronense</i> Henrard<br><i>P. rojasii</i> Hack. |
| <i>P. ionanthum</i> Chase               | 4x           | R        | S + App                        | Burson and Bennett (1970)                                                                                          |                                                           |
|                                         | –            | R        | S or S + App                   | Martínez <i>et al.</i> (1999)                                                                                      |                                                           |
|                                         | 8x           | mca      | Ap                             | Burson and Bennett (1970)                                                                                          | <i>P. yaguaronense</i> Henrard<br><i>P. rojasii</i> Hack. |
| <i>P. jurgensii</i> Hack.               | 2x           | R        | S                              | Bashaw <i>et al.</i> (1970); Burson and Bennett (1971)                                                             |                                                           |
| <i>P. langei</i> (E. Fourn.) Nash       | –            | –        | S                              | Brown and Emery (1958)                                                                                             | <i>P. yaguaronense</i> Henrard<br><i>P. rojasii</i> Hack. |
| <i>P. laxum</i> Lam.                    | 6x           | R        | S sf                           | Quarin <i>et al.</i> (1982)                                                                                        |                                                           |
| <i>P. lenticolare</i> Kunth             | 2x           | R        | S ss                           | Espinoza <i>et al.</i> (2001)                                                                                      |                                                           |
|                                         | 4x           | mca      | Ap                             | Espinoza <i>et al.</i> (2001)                                                                                      |                                                           |

Continued

TABLE 1. Continued

| Specie                                     | Ploidy level | Meiosis* | Reproductive mode <sup>†</sup> | References                                                                               | Referred to as                                                                                                                                                                                                           |
|--------------------------------------------|--------------|----------|--------------------------------|------------------------------------------------------------------------------------------|--------------------------------------------------------------------------------------------------------------------------------------------------------------------------------------------------------------------------|
| <i>P. lividum</i> Trin.                    | 4x           | mca      | Ap                             | Burson and Bennett (1971); Sartor <i>et al.</i> (2011)                                   |                                                                                                                                                                                                                          |
| <i>P. longifolium</i> Roxb.                | 4x           | desy     | Dp                             | Chao (1974)                                                                              |                                                                                                                                                                                                                          |
| <i>P. maculosum</i> Trin.                  | 2x           | R        | S ss                           | Norrmann <i>et al.</i> (1989)                                                            |                                                                                                                                                                                                                          |
|                                            | 4x           | mca      | Ap                             | Norrmann <i>et al.</i> (1989)                                                            |                                                                                                                                                                                                                          |
| <i>P. malacophyllum</i> Trin.              | 2x           | R        | S ss + App                     | Hojsgaard <i>et al.</i> (2008)                                                           |                                                                                                                                                                                                                          |
|                                            | 4x           | mca      | S                              | Bennett and Bashaw (1966)                                                                |                                                                                                                                                                                                                          |
|                                            | –            | mca      | Ap                             | Burson and Hussey (1998);<br>Hojsgaard <i>et al.</i> (2008)                              |                                                                                                                                                                                                                          |
|                                            | –            | –        | Ap                             | Brown and Emery (1958)                                                                   |                                                                                                                                                                                                                          |
| <i>P. mandiocanum</i> Trin.                | 6x           | R        | Ap                             | Burson and Bennett (1971)                                                                |                                                                                                                                                                                                                          |
| <i>P. minus</i> E. Fourn.                  | 5x           | asy      | Dp + Ap                        | Bonilla and Quarin (1997)                                                                |                                                                                                                                                                                                                          |
| <i>P. modestum</i> Mez                     | 2x           | R        | S ss                           | Burson (1997); Quarin and Hanna (1980a)                                                  |                                                                                                                                                                                                                          |
| <i>P. monostachyum</i> Vasey               | 2x           | R        | S ss                           | Burson (1997)                                                                            |                                                                                                                                                                                                                          |
|                                            | –            | –        | S                              | Brown and Emery (1958)                                                                   |                                                                                                                                                                                                                          |
| <i>P. nicorae</i> Parodi                   | 4x           | mca      | Ap                             | Bashaw <i>et al.</i> (1970); Burson and Bennett (1970);<br>Sartor <i>et al.</i> (2011)   |                                                                                                                                                                                                                          |
| <i>P. notatum</i> Flügge                   | 2x           | R        | S ss                           | Burton (1948); Burton (1955);<br>Bashaw <i>et al.</i> (1970)                             | Pensacola bahiagrass                                                                                                                                                                                                     |
|                                            | –            | –        | S + App                        | Quarin <i>et al.</i> (2001)                                                              |                                                                                                                                                                                                                          |
|                                            | 3x           | –        | Ap                             | Quarin <i>et al.</i> (1989)                                                              |                                                                                                                                                                                                                          |
|                                            | 4x           | mca      | Ap                             | Burton (1948); Bashaw <i>et al.</i> (1970)                                               |                                                                                                                                                                                                                          |
| <i>P. palustre</i> Mez                     | 2x           | R        | S ss                           | Quarin and Burson (1991)                                                                 |                                                                                                                                                                                                                          |
| <i>P. paniculatum</i> L.                   | 2x           | R        | S                              | Burson and Bennett (1971)                                                                |                                                                                                                                                                                                                          |
| <i>P. pauciciliatum</i> (Parodi)<br>Herter | 4x           | I        | Ap                             | Bennett and Bashaw (1966); Bashaw <i>et al.</i> (1970)                                   | <i>P. dilatatum</i> var.<br><i>pauciciliatum</i> Parodi                                                                                                                                                                  |
| <i>P. paucifolium</i> Swallen              | 4x           | mca      | Ap                             | Burson (1997)                                                                            |                                                                                                                                                                                                                          |
| <i>P. plicatulum</i> Michx.                | 2x           | R        | S ss                           | Espinoza and Quarin (1997)                                                               |                                                                                                                                                                                                                          |
|                                            | 4x           | mca      | Ap                             | Bashaw <i>et al.</i> (1970); Burson and Bennett (1971);<br>Norrmann <i>et al.</i> (1989) |                                                                                                                                                                                                                          |
| <i>P. polyphyllum</i> Nees ex<br>Trin.     | 4x           | mca      | Ap                             | Burson (1997)                                                                            |                                                                                                                                                                                                                          |
| <i>P. procurrens</i> Quarin                | 2x           | R        | S ss                           | Quarin (1993)                                                                            |                                                                                                                                                                                                                          |
|                                            | 4x           | mca      | Ap                             | Hojsgaard <i>et al.</i> (2008)                                                           |                                                                                                                                                                                                                          |
| <i>P. proliferum</i> Arechav.              | 4x           | mca      | Ap                             | Quarin <i>et al.</i> (1982)                                                              |                                                                                                                                                                                                                          |
|                                            | 6x           | I        | Ap                             | Burson (1975)                                                                            |                                                                                                                                                                                                                          |
| <i>P. pubiflorum</i> Rupr. ex<br>E. Fourn. | 6x           | R        | S                              | Bashaw <i>et al.</i> (1970); Actkinson and Burson<br>(1999)                              | <i>P. pubiflorum</i> var. <i>Glabrum</i><br>Vasey ex Scribn.                                                                                                                                                             |
|                                            | –            | –        | S                              | Brown and Emery (1958)                                                                   |                                                                                                                                                                                                                          |
| <i>P. pumilum</i> Nees                     | 2x           | R        | S sf                           | Burson and Bennett (1971)                                                                |                                                                                                                                                                                                                          |
| <i>P. quadrifarium</i> Lam.                | 2x           | R        | S ss + App                     | Norrmann <i>et al.</i> (1989)                                                            |                                                                                                                                                                                                                          |
|                                            | 3x           | mca or I | Ap                             | Bashaw <i>et al.</i> (1970); Norrmann <i>et al.</i> (1989)                               |                                                                                                                                                                                                                          |
|                                            | 4x           | mca      | Ap                             | Quarin and Burson (1983);<br>Norrmann <i>et al.</i> (1989)                               |                                                                                                                                                                                                                          |
| <i>P. quarinii</i> Morrone &<br>Zuloaga    | 2x           | R        | Sss + App                      | Norrmann <i>et al.</i> (1989)                                                            | <i>P. brunneum</i> Mez                                                                                                                                                                                                   |
|                                            | 4x           | mca      | Ap                             | Burson (1975); Norrmann <i>et al.</i> (1989)                                             | <i>P. brunneum</i> Mez                                                                                                                                                                                                   |
| <i>P. ranboi</i> Barreto                   | 6x           | R        | Ap                             | Quarin and Burson (1991)                                                                 |                                                                                                                                                                                                                          |
| <i>P. regnelli</i> Mez                     | 4x           | R        | S sf                           | Norrmann (1981)                                                                          |                                                                                                                                                                                                                          |
| <i>P. repens</i> P.J. Bergius              | 2x           | R        | S sf                           | (Burson, 1997)                                                                           |                                                                                                                                                                                                                          |
| <i>P. rufum</i> Nees                       | 2x           | R        | S ss + App                     | Norrmann <i>et al.</i> (1989); Siena <i>et al.</i> (2008)                                |                                                                                                                                                                                                                          |
|                                            | 4x           | mca      | Ap                             | Burson (1975); Norrmann <i>et al.</i> (1989)                                             |                                                                                                                                                                                                                          |
| <i>P. scrobiculatum</i> L.                 | 4x           | R        | S                              | Bashaw <i>et al.</i> (1970); Pritchard (1970)                                            | <i>P. commersonii</i> Lam.                                                                                                                                                                                               |
|                                            | –            | R        | S sf                           | Quarin and Hanna (1980a)                                                                 | <i>P. boscianum</i> Flügge                                                                                                                                                                                               |
|                                            | 6x           | asy      | Dp + App                       | Chao (1974)                                                                              | <i>P. commersonii</i> Lam.                                                                                                                                                                                               |
|                                            | 10x          | –        | Dp                             | Ma <i>et al.</i> (2009)                                                                  | <i>P. commersonii</i> Lam.                                                                                                                                                                                               |
|                                            | 12x          | R        | S + App                        | Chao (1974)                                                                              | <i>P. commersonii</i> Lam.                                                                                                                                                                                               |
| <i>P. secans</i> Itchc. & Chase            | 4x           | asy      | Ap                             | Snyder (1957)                                                                            |                                                                                                                                                                                                                          |
|                                            |              | I        | Ap                             | Bashaw <i>et al.</i> (1970)                                                              |                                                                                                                                                                                                                          |
| <i>P. setaceum</i> Michx.                  | 2x           | R        | S sf                           | Banks (1964, 1966)                                                                       | <i>P. debile</i> Michx.<br><i>P. ciliatifolium</i> Michx.<br><i>P. longepedunculatum</i> LeConte<br><i>P. propinquum</i> Nash<br><i>P. psammophilum</i> Nash<br><i>P. pubescens</i> Muhl.<br><i>P. rigidifolium</i> Nash |
|                                            | –            | –        | S                              | Brown and Emery (1958)                                                                   |                                                                                                                                                                                                                          |

Continued

TABLE 1. Continued

| Specie                                          | Ploidy level | Meiosis* | Reproductive mode <sup>†</sup> | References                                          | Referred to as                |
|-------------------------------------------------|--------------|----------|--------------------------------|-----------------------------------------------------|-------------------------------|
| <i>P. simplex</i> Morong<br>ex Britton          | 2x           | R        | S ss                           | Espinoza and Quarin (1997)                          |                               |
|                                                 | 3x           | –        | S                              | Urbani <i>et al.</i> (2002)                         |                               |
|                                                 | 3x           | –        | Ap                             | Urbani <i>et al.</i> (2002)                         |                               |
|                                                 | 4x           | mca      | Ap                             | Caponio and Quarin (1987)                           |                               |
|                                                 | 6x           | –        | –                              | Urbani <i>et al.</i> (2002)                         |                               |
| <i>P. thunbergii</i> Kunth<br>ex Steud.         | 4x           | I        | Ap                             | Ma <i>et al.</i> (2004)                             |                               |
| <i>P. umbrosum</i> Trin.                        | 2x           | R        | S                              | Bashaw <i>et al.</i> (1970)                         |                               |
| <i>P. unispicatum</i> (Scribn.<br>& Merr.) Nash | 4x           | mca      | Ap                             | Burson (1997)                                       |                               |
| <i>P. urvillei</i> Steud.                       | 4x           | R        | S                              | Brown and Emery (1958); Bashaw <i>et al.</i> (1970) |                               |
| <i>P. vaginatum</i> Sw.                         | 2x           | R        | S                              | Bashaw <i>et al.</i> (1970)                         |                               |
| <i>P. virgatum</i> L.                           | 4x           | R        | S                              | Burson and Quarin (1982)                            |                               |
| <i>P. wrightii</i> Hitchc. & Chase              | 2x           | R        | S ss                           | Martínez <i>et al.</i> (1999)                       | <i>P. hydrophilum</i> Henrard |
|                                                 | 4x           | mca      | Ap                             | Norrmann (1981)                                     | <i>P. hydrophilum</i> Henrard |

For practical reasons, the species of the newly recognized subgenus *Harpotachys* (formerly genus *Thrasya*) are not included in this review.

\*R, regular (mainly bivalent pairing); I, irregular (bivalents plus one or two unpaired genomes), mca, multivalent chromosome associations (mainly presence of quadrivalents), asy or desy, asynapsis or desynapsis (majority of chromosomes unpaired).

<sup>†</sup>S, sexual; Dp, diplosporous apomictic; Ap, aposporous apomictic; App, aposporous potential (occasional ovules with an aposporous sac beside the sexual sac); ss, self-sterile; sf, self-fertile.

Comparative cytogenetic examinations during microsporogenesis revealed meiotic abnormalities at anaphase I in *P. notatum* apomicts, which were attributed to genetic rearrangements, such as an inversion or a translocation in one chromosome (Stein *et al.*, 2004). Conversely, male meiosis in natural sexual cytotypes is always regular (formation of bivalent chromosome associations and balanced gametes), with some rare cases of quadrivalent formation in sexual *P. malacophyllum* and *P. conspersum* (Table 1). Colchicine-induced sexual tetraploids of *P. notatum* and their derivatives showed high rates of meiotic abnormalities, though their proportions were significantly lower when compared with those detected in natural conspecific apomictic genotypes (Podio *et al.*, 2012b). Frequent formation of  $2n$  pollen as a consequence of abnormal cytokinesis followed by nuclear fusion of multinucleate microspores has been reported in polyploid Brazilian accessions of *Paspalum* by Pagliarini *et al.* (1999). Although there is no evidence of correlation between abnormal cytokinesis and apomixis, the occurrence of restitution nuclei as a consequence of irregular or arrested meiosis has been reported in connection with apomixis in *P. secans* (Snyder, 1961), *P. conjugatum* (Chao, 1980) and *P. minus* (Bonilla and Quarin, 1997). To sum up, experimental evidence supports a correlation between the occurrence of meiotic abnormalities and apomixis in *Paspalum*. These abnormalities might be related to the rearranged nature of the chromosome bearing the apomixis locus.

Endosperm development in angiosperms requires an exact maternal-to-paternal (2m:1p) genomic balance, and any deviation from it usually results in seed abortion, although this is not inevitable and depends on the genetic context (Schatlowski and Köhler, 2012, and references therein). All *Paspalum* apomicts are pseudogamous, meaning that the endosperm develops after fertilization of the polar nuclei by a reduced male gamete. In *P. notatum*, seed development in apomicts is insensitive to dosage effects in the endosperm in spite of the strong, maternal

genomic excess, whereas in the sexual biotypes the 2m:1p balance is strictly required for normal endosperm development and seed production (Quarin, 1999).

The number and fertilization of the polar nuclei in aposporous ESs is also of practical importance in apomixis research, particularly when the method of reproduction must be determined for a large number of individuals. The development of the flow cytometric seed screen (FCSS) method (Matzk *et al.*, 2000) has facilitated identification of the reproductive mode for large sample numbers because in *Paspalum* the relative ratio of embryo:endosperm DNA content distinguishes seeds of apomictic origin from those formed sexually. A sexually produced seed is formed by an embryo ( $n + n$ ) which has arisen from fertilization of the reduced egg cell ( $n$ ) by a reduced sperm nucleus ( $n$ ), and endosperm derived from fertilization of two reduced polar nuclei by a reduced sperm nucleus [ $(n + n) + n$ ]. Therefore, this seed has a 2:3 embryo:endosperm ratio of DNA content. On the other hand, a seed formed through apospory, parthenogenesis (embryo from  $2n + 0$ ) and pseudogamy [endosperm from  $(2n + 2n) + n$ ] has a 2:5 embryo:endosperm DNA ratio. The FCSS technique applied to individual or bulked seeds has greatly facilitated the analyses of the reproductive mode in *Paspalum* species in the last decade (Cáceres *et al.*, 2001; Siena *et al.*, 2008; Sartor *et al.*, 2009, 2011; Aguilera *et al.*, 2011; Rebozzio *et al.*, 2011; Hojsgaard *et al.*, 2013).

The genetic systems observed in *Paspalum* have been categorized into eight different groups (Table 2). Most species (approx. 70 %) belong to groups 2, 3 and 4. Group 2 comprises sexual self-sterile (outbreeder) diploids. Group 3 consists of multiploids, whose chromosome races include both diploid outbreeders and apomictic polyploids. Group 4 is formed by aposporous apomictic polyploids with usually multivalent chromosome associations at meiosis, pseudogamy and self-fertility. Because most studies have considered only one or a few individuals for each species, the published data suggest that most species in groups

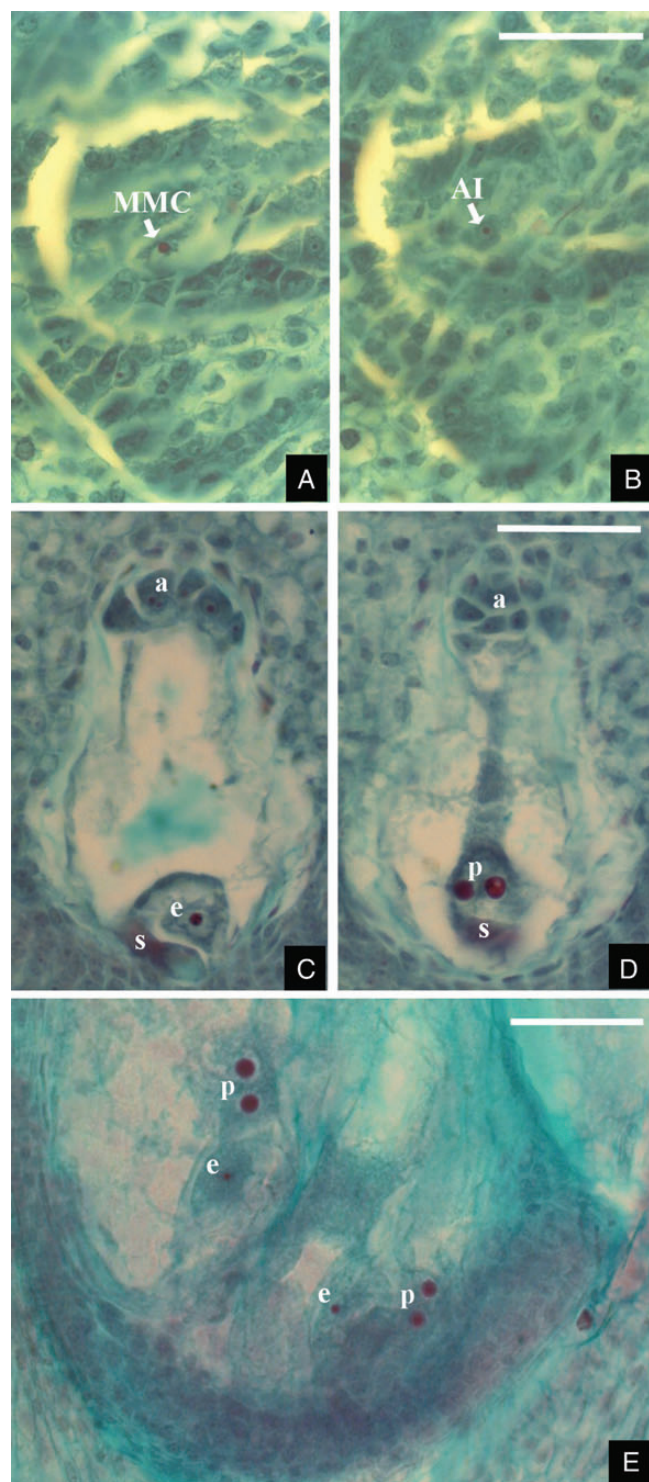

FIG. 2. Photomicrographs of sectioned ovaries of sexual and apomictic *Paspalum* species. (A, B) Apomictic tetraploid cytotype of *P. notatum*. Two consecutive sections of a young ovary showing the megaspore mother cell (MMC) and one nucellar aposporous initial cell (AI). (C, D) Sexual diploid cytotype of *P. cromoerhizon*. Two consecutive sections of a mature ovary showing a well developed sexual embryo sac bearing the egg cell (e), two synergids (s), a large central cell with two polar nuclei (p) and a mass of proliferated antipodal cells (a) at the chalazal end of the embryo sac. (E) Apomictic tetraploid cytotype of *P. cromoerhizon*. Section of a mature ovule showing two aposporous embryo sacs, each containing an egg cell (e) and two polar nuclei (p). Scale bars: (A, B) = 20  $\mu\text{m}$ , (C–E) = 50  $\mu\text{m}$ .

2 and 4 might actually be members of group 3. Once the genetic system is screened for more individuals per natural population, diploid cytotypes might be discovered among apomictic polyploids (group 4), and apomictic polyploids might be found among sexual self-sterile diploids (group 2).

#### Variability in natural populations

Apomixis was first considered as a blind alley for evolution (Darlington, 1939), suggesting that clonal seed production would result in genetically uniform populations. However, studies in natural populations of apomictic *Paspalum* spp. revealed a high level of variation in ploidy and genetic structure (Urbani et al., 2002; Daurelio et al., 2004; Sartor et al., 2011). Chromosome counts and ploidy level estimates by flow cytometry from 32 populations of *P. simplex* showed that most individuals were tetraploid and that diploid populations were confined to a small area (Urbani et al., 2002). On the other hand, Sartor et al. (2011) analysed the ploidy levels and reproductive mode of 19 populations from five species and found that diploid populations reproduced sexually, while polyploids ( $2n = 3x, 4x, 5x$  and  $6x$ ) reproduced by apomixis. Interestingly, apomixis in  $4x$  individuals was facultative (i.e. they produced some of their progeny by sexual means), while other polyploid individuals were obligate apomicts. Finally, analysis of facultative apomicts revealed variations in the degree of facultativeness (2–30 %) as well as in the origin of non-maternal progeny (via sexual reproduction or fertilization of unreduced egg cells) (Cáceres et al., 2001; Urbani et al., 2002). Daurelio et al. (2004) showed that variability in tetraploid *P. notatum* was significantly higher in sympatric diploid–tetraploid populations than in those tetraploid populations isolated from diploids. Similarly, Sartor et al. (2011) observed higher levels of genetic variability in mixed ploidy populations of *P. rufum*, *P. denticulatum* and *P. unispicatum* than in pure populations. These results support the hypothesis of recurrent polyploidization for the majority of *Paspalum* species proposed by Quarin (1992) (see ‘Apomixis, hybridity and polyploidy’ below for details) according to which new apomictic tetraploid genotypes would be continuously generated, thereby increasing the genetic variability of apomictic populations.

#### Agronomy and genetic improvement

From a plant breeding perspective, apomixis provides a unique mechanism for developing superior cultivars and preserving those genotypes indefinitely. Generally speaking, the three fundamental prerequisites of any successful plant breeding programme are: (1) availability of a diverse germplasm collection; (2) adequate knowledge of the biology, cytology and reproductive system of the available material; and (3) explicit and achievable objectives. In other sections of this review, we clearly demonstrate that *Paspalum* meets the first two prerequisites; here we discuss objectives and breeding strategies related to apomictic reproduction.

Among the species of *Paspalum*, *P. notatum* and *P. dilatatum* are the most widely cultivated forage grasses. Specific objectives for *Paspalum* breeding consist of the enhancement of: (1) cold tolerance and cool-season growth; (2) seed yield; (3) grazing resistance; (4) nutritive value; and (5) resistance to biotic stresses.

TABLE 2. Summarized genetic system for 72 species of Paspalum

| Group no. | Genetic system*                                                                                                                                                                                                                                                                                                   | No. of species |
|-----------|-------------------------------------------------------------------------------------------------------------------------------------------------------------------------------------------------------------------------------------------------------------------------------------------------------------------|----------------|
| 1         | Diploid, regular meiosis, sexual and self-fertile.                                                                                                                                                                                                                                                                | 6              |
| 2         | Diploid, regular meiosis, sexual and self-sterile. Apospory potential observed in two species.                                                                                                                                                                                                                    | 12             |
| 3         | Multiploid (diploid and polyploid cytotypes): diploids with regular meiosis, sexual and self-sterile, though apospory potential was observed in eight diploid cytotypes; polyploids (mainly 4x) with usually multivalent chromosome associations at meiosis, aposporous apomictic, pseudogamous and self-fertile. | 19             |
| 4         | Polyploid (mainly 4x) usually with multivalent chromosome associations at meiosis suggesting autopolyploidy, exceptionally with unpaired chromosomes (allopolyploidy), aposporous apomictic, pseudogamous and self-fertile.                                                                                       | 19             |
| 5         | Polyploid (mainly 4x and some 6x), bivalent chromosome associations at meiosis indicating allopolyploidy, sexual reproduction, self-fertile.                                                                                                                                                                      | 9              |
| 6         | Multiploid of allopolyploid origin (sexual 4x plus higher polyploid aposporous cytotypes: 5x, 6x or 8x), tetraploids with regular chromosome pairing, higher polyploids with regular or irregular meiosis. <i>P. dilatatum</i> , <i>P. durifolium</i> , <i>P. ionanthum</i> .                                     | 3              |
| 7         | Polyploid, asynaptic or desynaptic chromosome behaviour at meiosis, restitution nucleus, diplosporous apomictic. <i>P. conjugatum</i> , <i>P. longifolium</i> , <i>P. minus</i> (diplospory + apospory).                                                                                                          | 3              |
| 8         | Sexual tetraploid and higher polyploid cytotypes with diplosporous apomixis and some potential for apospory. <i>P. scrobiculatum</i> .                                                                                                                                                                            | 1              |
|           | Total                                                                                                                                                                                                                                                                                                             | 72             |

\*Genetic systems are reported as described in the available literature. When information on breeding system (self-fertility or self-sterility) was missing in the references, personal data (C. L. Quarin, unpubl.) were added.

Because most *Paspalum* species reproduce asexually by apomixis, specific breeding techniques must be used to enhance their genetics. These techniques are all based on fixing superior genotypes via apomixis. Ecotype selection is the oldest and the most productive breeding approach. This technique involves germplasm collection evaluation, selection, multiplication of the best ecotypes, and release of superior genotypes as new apomictic cultivars, i.e. seed-propagated clones. The success of ecotype selection depends on the number of polymorphic ecotypes within a species (Vogel and Burson, 2004). As an example, the tetraploid ‘Argentine’ (PI 148996) cultivar, released in the mid-20th century as the result of evaluating approx. 80 accessions of *P. notatum*, is still sown for pasture and utility turf (Blount and Acuña, 2009). Cultivars of *P. dilatatum*, which is better adapted to temperate areas than *P. notatum*, have been selected as natural variants from the apomictic pentaploid and hexaploid cytotypes (Evers and Burson, 2004; Burson et al., 2008). Of particular interest is the *Plicatula* group, a diverse assemblage that includes many forage types. Several cultivars have been released from this group belonging to *P. atratum*, *P. guenoarum* and *P. plicatulum* (Evers and Burson, 2004).

Hybridization has been used more recently to enrich cultivars for specific traits of interest. The success of hybridization in *Paspalum* breeding depends on the availability of sexual polyploid cytotypes. Improving apomictic *Paspalum* via hybridization began with the pioneering work of Dr G. W. Burton (USDA-ARS, Tifton, GA, USA) and his colleagues who generated colchicine-induced sexual tetraploid plants (Burton and Forbes, 1960) and hybridized these induced autotetraploids with naturally occurring tetraploid ecotypes to obtain many apomictic hybrids that were never released as cultivars (Burton, 1992). Twenty out of several hundreds induced hybrids created by tissue culture were selected for a breeding programme for resilience to clipping (Quesenberry et al., 2010), and a few others, characterized as highly sexual and self-incompatible, were crossed with highly productive apomictic genotypes (Acuña et al., 2007). After two cycles of hybridization, a high degree of variability and heterosis was observed (Acuña et al., 2007, 2009, 2011). Superior apomictic hybrids are currently being

evaluated in different environments and are expected to result in new apomictic forage cultivars. One of the original sexual tetraploid hybrids was hybridized with an Argentinean local ecotype to yield several hybrids, from which the cultivar named ‘Boyero UNNE’ was selected and released in 2012 as the first apomictic cultivar of *Paspalum* developed by hybridization. In addition, two sexual clones (i.e. they generate their progeny exclusively sexually) have been released and are currently available (Quarin et al., 2003). Completely sexual tetraploid genotypes of *P. simplex* (Cáceres et al., 1999) and *P. plicatulum* Michx. (Sartor et al., 2009) have also been generated. These plants are used as female parents to enhance variability through both intra- and interspecific hybridization. Indeed, fertile hybrids can be generated by crossing the induced sexual tetraploid of *P. simplex* with natural tetraploid ecotypes of the same species, as well as with *P. malacophyllum* and *P. procurrens* (Pupilli et al., 2004; Hojsgaard et al., 2011, respectively). Hybrid genotypes characterized by high forage production have been obtained using this approach. Fertile hybrids have also been obtained by crossing a sexual tetraploid genotype of *P. plicatulum* with conspecific apomicts or with apomicts of *P. guenoarum* Arechav. (Aguilera et al., 2011). Increasing the low number of apomictic hybrids produced in crosses, predicting the occurrence of heterosis and selecting for highly self-incompatible hybrids would dramatically enhance the efficiency and usefulness of this breeding approach. In particular, the loss of self-incompatibility in hybrids could induce inbreeding depression and limit the yield of hybrids in crosses. Although most diploid and induced tetraploid plants of *P. notatum* are self-incompatible (Burton, 1955; Acuña et al., 2007), this characteristic is absent in apomictic plants (Acuña et al., 2007). Thus, modulation of self-incompatibility in breeding programmes should be further investigated.

Ionizing radiation was used to breed early introductions of *P. dilatatum* in the USA when breeders failed to generate variability through hybridization (Evers and Burson, 2004). Most of the resulting plants were aberrant; only a few exhibited good agronomic characteristics and none was ever released. Genetic transformation has also been used to improve *Paspalum*



species as forage or turf. The biolistic method was used to obtain transgenic plants of diploid and tetraploid *P. notatum* (Altpeter and James, 2005; Gondo et al., 2005). Glufosinate-resistant plants of *P. notatum* were obtained by transforming plants of the cultivar ‘Argentine’ with the *bar* gene (Sandhu et al., 2007). These genetically modified plants proved to be highly resistant to this herbicide under field conditions, enhancing their competitive ability against weeds during pasture establishment. The transcription factor gene *Hs-DREB1A* from xeric *Hordeum spontaneum* was also introduced into ‘Argentine bahiagrass’ to enhance water stress tolerance (James et al., 2008). In addition, to increase turf quality, the endogenous gibberellin-catabolizing gene *At-GA2ox1* was inserted into the genome of ‘Argentine bahiagrass’ (Agharkar et al., 2007). Transformed plants exhibited higher turf density, shorter tillers and delayed flowering. However, none of these new genetically modified plants has been released. Although Sandhu et al. (2010) showed that both apomixis and polyploidy are major barriers to pollen-mediated transgene flow from transformed bahiagrass to wild types, the public remains concerned about the safety of transgenic plants.

In summary, the coexistence of apomixis and sexuality in *Paspalum* species is a great advantage for breeding. A wide variety of traits of interest occur in existing germplasm collections or can be induced by traditional or biotechnological tools. These traits can be rapidly fixed in superior hybrid strains by apomixis.

## INHERITANCE OF APOMIXIS IN *PASPALUM* SPECIES

### Genetic analysis

Apomixis is a heritable reproductive system thought to have evolved through a rearrangement of the developmental programmes that constitute the normal sexual pathway (Grimanelli et al., 2001). Nogler (1984) suggested that the basic determinants of apomixis could have originated by mutation and that most of the genes involved in the process would probably be similar to those implicated in sexual reproduction. Genetic studies on the inheritance of apomixis in *Paspalum* spp. were performed mainly on *P. notatum* Flügge and *P. simplex* Morong, two genetically distant species comprising sexual self-incompatible diploids and nearly obligate tetraploid apomicts. Genetic analysis of apomixis in these species is impossible unless sexual tetraploid germplasm is available. The production of artificial sexual tetraploid individuals (Quarin et al., 1984, 2001, 2003; Cáceres et al., 1999; Quesenberry et al., 2010) allowed the generation of populations segregating for the mode of reproduction, without the need for interspecific or interploidy crosses.

A pioneering study on the genetic control of apomixis in *Paspalum* was carried out by Burton and Forbes (1960). Using progeny testing for morphological traits in *P. notatum* segregating populations derived from an experimentally obtained sexual female progenitor and a natural apomictic pollen donor, they proposed that apomixis was controlled by a few recessive genes. Several subsequent studies have concentrated on the inheritance of apospory i.e. the capacity to develop non-reduced ESs. Segregation analysis of apospory in  $F_1$  progeny from an interspecific cross *P. ionanthum* (tetraploid sexual)  $\times$  *P. cromyorrhizon* (facultative tetraploid apomict) revealed a 3:1 aposporous:

non-aposporous ratio (Martínez et al., 1999). Two models for the genetic control of the trait were proposed, but these could not be corroborated because most hybrids were male sterile.

The use of intraspecific crosses between a completely sexual tetraploid female genotype and natural apomictic progenitors in *P. notatum* allowed investigation of the reproductive modes across several generations (Martínez et al., 2001). Segregation ratios of 1:2:8 to 1:3 aposporous vs. sexual progeny led the authors to propose that a single tetrasomically inherited dominant allele with a pleiotropic lethal effect and incomplete penetrance controls apospory development. An excess of sexual progeny, which deviated from the expected Mendelian ratios of 1:1 or 13:15 (assuming random assortment of chromosomes or chromatids, respectively), was repeatedly observed in segregating populations of *P. notatum* (Stein et al., 2004; Acuña et al., 2009, 2011), *P. simplex* (Pupilli et al., 2001), *P. malacophyllum* (Pupilli et al., 2004), *P. procurrens* (Hojsgaard et al., 2011) and *P. plicatulum* (Aguilera et al., 2011). Similar distortions in favour of sexual individuals have been observed in segregating populations of several apomictic grasses (Ozias-Akins and van Dijk, 2007). The most common hypothesis to explain the low transmission rate of apomixis in segregating populations is the presence of a lethal allele linked to the apomixis locus acting at either the gametophytic or sporophytic level. Nogler (1982) postulated the existence of a dominant apospory factor that acts as a recessive lethal allele. This apospory factor could not be transmitted through monoploid gametes, explaining the absence of natural diploid apomictic plants. This hypothesis was partially confirmed in *P. notatum* and *P. simplex* where, in intraspecific crosses involving sexual diploids and tetraploids as pistillate parents and apomict triploids as pollen donors, apospory could only be transmitted by pollen through diploid or hypodiploid gametes (Martínez et al., 2007). Several pieces of experimental evidence confirmed that genetic rearrangements and meiotic abnormalities were associated with apospory in *P. notatum* (Pupilli et al., 2004; Stein et al., 2004; Podio et al., 2012b). The presence of an inversion or translocation at the apomixis locus could explain both the distorted segregation ratio of apospory, via differential survival of meiocytes carrying the rearranged locus, and the observed suppression of recombination near that locus (see below). In addition, meiotic drive, a mechanism that allows one of the allelic alternatives to be transmitted in excess to the progeny (Lyttle, 1991), was proposed as a cause of apomixis segregation distortion in maize–*Tripsacum dactyloides* hybrids (Grimanelli et al., 1998) and pearl millet–*Pennisetum squamulatum* hybrids (Roche et al., 2001). An explanation for the preferential transmission of sexuality in segregating populations of *Hieracium* invoked the presence of post-meiotic factors favouring the development of sexual embryos (Bicknell et al., 2000). Polegri et al. (2010) reported that, of nearly 200 genes differentially expressed between apomictic and sexual lines of *P. simplex*, only 10 % were genetically associated with apomixis (discussed below). Consequently, transferring the apomixis locus from an apomictic ‘donor’ to a sexual ‘receiver’ genotype (the parental lines of a segregating population) would reprogramme the expression of a group of genes that presumably act downstream of apomixis-linked factors. This reprogramming could affect a delicate network of gene–gene communication probably based on homology. If even a few of these interactions

do not work properly, the apomictic zygotes could be lethal or disadvantaged relative to sexual zygotes. These interactions would fail more frequently as genetic distance between the parents increased, because the sexual ‘receiver’ genotype might be unable to adapt to a new apomictic condition. Therefore, zygotic lethality (or its coexistence with male gametophytic lethality) could explain the low transmission rate of apomixis in *Paspalum* and the striking differences in its segregation distortion between interspecific and intraspecific crosses in *P. simplex*.

#### *Apomixis, hybridity and polyploidy*

Hybridization and polyploidization represent two important processes in the evolution of angiosperms. Both mechanisms were investigated with regard to their role in the emergence of apomixis from sexuality (Carman, 1997; Ozias-Akins and van Dijk 2007; Pupilli and Barcaccia, 2012). In *Paspalum*, as in many other agamic complexes, the sexual–diploid/apomictic–polyploid conditions seem to constitute a common genetic system for a large number of species (Quarin, 1992). However, the relative contributions of these processes as yet remain unclear. Ernst (1918) maintained that all apomicts are of hybrid origin, and Stebbins (1941) added that the great majority of apomicts are probably allopolyploids of hybrid origin. Nogler (1984) in his comprehensive review of apomixis in plants also considered allopolyploidy and hybridity essential for the occurrence of apomixis. More recently, these concepts have been reformulated by Carman (1997) as the ‘hybridization theory’. This theory suggests that hybridization of species with dissimilar ecological affinities and reproductive developmental programme timing contributes to the induction of apomixis. Thus, asynchronous expression of the two parental gene sets could lead to the aberrant initiation of embryological processes during ovule development, causing a shift from sexual to apomictic reproduction. Cytogenetic studies and breeding behaviour analyses of several species and of interspecific hybrids, as well as the segregation analysis in apomictic tetraploid species and induction of artificial apomictic tetraploids from sexual diploids, partially support these views. On one hand, polyploidy seems to be a prerequisite for the expression of apomixis (Quarin and Hanna, 1980a; Quarin et al., 1998, 2001). On the other hand, cytogenetic studies in apomictic polyploids have suggested an autopolyploid rather than an allopolyploid origin of most *Paspalum* apomicts (Bennett and Bashaw, 1966; Norrmann et al., 1989; Pupilli et al., 1997; Stein et al., 2004; Hojsgaard et al., 2008). In addition, artificial autopolyploidization of sexual diploids in several *Paspalum* species triggered and maintained apomictic reproduction (Quarin and Hanna, 1980a; Quarin et al., 1998, 2001). Nevertheless, there are a few examples of apomictic allopolyploid species: (1) 5x and 6x dallisgrass, *P. dilatatum* Poir., derived from hybridization between 4x dallisgrass apomicts and 2x *P. urvillei* (Bashaw and Forbes, 1958; Bashaw and Holt, 1958; Burson et al., 1991); and (2) the tetraploid *P. dasyleurum* Kunze & Desv. (the *Paspalum* species with the southernmost distribution in South America), another *P. dilatatum* sexual relative (Quarin and Caponio, 1995). These apomictic 5x and 6x cytotypes of *P. dilatatum* and their tetraploid relatives constitute the *Dilatata* group of *Paspalum*. They share two basic genomes: the genome I of sexual self-sterile diploid

*P. intermedium* Munro ex Morong & Britton and the genome J, which belongs to *P. jurgensii* Hack, a sexual self-fertile diploid species (Burson, 1991, 1992). An allopolyploid origin of the apomictic pentaploid dallisgrass (the common biotype) was proposed by both Burson (1992) and Speranza (2009), but their interpretations of the evolutionary patterns are different. Burson (1991, 1992) proposed that the common biotype (IIJX) originated by natural hybridization between a sexual tetraploid cytotype (genome formula IIJJ) and an apomictic hexaploid form (genome formula IIJJXX). Speranza (2009) considered that the pentaploid cytotype was probably the first apomictic form of the group that can produce new IIJX pentaploids through the formation of euploid IJX male gametes and their fusion with egg cells derived from sexual IJJ tetraploids. Regardless of how the common apomictic pentaploid cytotype of *P. dilatatum* evolved, it clearly had an allopolyploid origin, and the control of apomixis is in the non-recombining X genome. The apomictic common type of dallisgrass is one of the first and most widely investigated species of the genus and could be regarded erroneously as a paradigm for apomixis research in *Paspalum*. The fact is that most apomictic *Paspalum* entities belong to multiploid species of autopolyploid origin. Each multiploid contains a sexual self-sterile diploid cytotype and a series of aposporous apomictic autopolyploid cytotypes, usually from 3x to 6x, with tetraploids as the most common cytotype (Table 2). Autopolyploidy may evolve stepwise through fertilization of occasional aposporous ESs which have arisen in diploids beside the normal meiotic sac (Quarin et al., 1982, 2001; Norrmann et al., 1989). In this way, diploids could give rise to triploids by  $2n + n$  fertilization ( $2x + x = 3x$ ). New tetraploids could be established in the same way from rare apomictic triploids and sympatric diploids ( $2n + n$ ;  $3x + x = 4x$ ) or via fertilization of unreduced gametes from diploids by reduced gametes of naturally occurring tetraploids ( $n = 2x$ ), i.e.  $2x + 2x = 4x$  (Quarin, 1992; Siena et al., 2008). Whether the tetraploid cytotype or the entire series of polyploid cytotypes in multiploid species have autopolyploid origins may be questionable. Segmental allopolyploidy has been proposed for several species (groups 3 and 4 in Table 2), but the classification as autopolyploids or segmental allopolyploids is uncertain for several species (e.g. Burson and Bennett, 1970b, 1971; Quarin and Burson, 1991).

Although there is a strong link between apomixis and polyploidy, a few cases of gametophytic apomixis have been described at the diploid level. Ovules bearing both an aposporous and a meiotic ES were sporadically observed in several diploid species of *Paspalum* (Quarin and Norrmann, 1987; Norrmann et al., 1989; Quarin et al., 2001; Hojsgaard et al., 2008). These observations suggested the potential for apomictic reproduction at the diploid level, although evidence of parthenogenesis from those rare aposporous sacs was lacking. Recently, Siena et al. (2008) showed that a diploid plant of *P. rufum*, when exposed simultaneously to its own reduced haploid pollen ( $n = x$ ) and mentor reduced pollen ( $n = 2x$ ) from a *P. urvillei* tetraploid strain, produced some diploids and polyploid descendants by apomixis. These data indicate that the factor(s) responsible for apomixis are effectively expressed in diploid plants, but at very low rates. In addition, polyploidization might also lead to the normal expression of apomixis, as occurred when new tetraploids were induced by colchicine from sexual diploid plants

in *P. hexastachyum* (= *P. alatum*), *P. rufum* and *P. notatum* (Quarin and Hanna, 1980b; Quarin et al., 1998, 2001). Why apomixis is poorly expressed or silent in diploids is still unclear. This is a critical issue regarding the use of apomixis in diploid crops.

### MOLECULAR DISSECTION OF THE APOMIXIS-CONTROLLING REGION

#### Molecular markers linked to apomixis and comparative mapping analyses

Apomictic reproduction in *Paspalum* is controlled by a single dominant locus that, when present, confers nearly 100 % apospory, a variable degree of parthenogenesis and full capacity to form endosperm with 4:1 maternal:paternal genome ratios (Cáceres et al., 2001; Martínez et al., 2001, 2003; Pupilli et al., 2004; Stein et al., 2004). These three apomixis components are probably inherited as a linkage block, because no recombination event has been documented to date. Molecular mapping of apomixis in *Paspalum* led to three main findings: (1) validation of segregation distortion and lack of genetic recombination around the apomixis locus; (2) establishment of syntenic relationships between apomixis-related markers and the rice map; and (3) narrowing of the chromosome region containing the apomixis locus by interspecific comparative mapping.

Using heterologous probes, Pupilli et al. (2001) identified a set of markers that, although they spanned 15 cM apart in a distal region of the long arm of rice chromosome 12, strictly co-segregated with apomixis in *P. simplex*. Similar results were obtained in *P. notatum*, but synteny was detected for rice chromosomes 12 and 2 as well as for maize chromosomes 3 and 5 (Martínez et al., 2003; Pupilli et al., 2004; Podio et al., 2012a; Fig. 3). Moreover, various random molecular markers [randomly

amplified polymorphic DNA (RAPD), amplified fragment length polymorphism (AFLP) and restriction fragment length polymorphism (RFLP)] completely linked to the apospory locus were detected in *P. simplex* (Labombarda et al., 2002) and *P. notatum* (Martínez et al., 2003; Pupilli et al., 2004; Stein et al., 2004, 2007). Overall, comparative molecular analyses and cytological studies revealed that the apomixis-controlling region (ACR) in both *P. simplex* and *P. notatum* species appears to be located in a chromosome region where genetic recombination is suppressed. This structure seems to be highly conserved across apomictic races of *P. notatum* (Rebozzio et al., 2012).

Lack of recombination at the apomixis locus has been observed in several apomictically reproducing plants (Ozias-Akins and van Dijk, 2007), and this fact was attributed to its hypothetical location in a heterochromatic pericentromeric position (Ozias-Akins et al., 1998). However, syntenic relationships with rice (Pupilli et al., 2001) and fluorescence *in situ* hybridization (FISH) analysis in *P. simplex* (Calderini et al., 2006) suggested that the ACR is located in a non-pericentromeric and heterochromatin-poor region where genes are transcriptionally active (Polegri et al., 2010). An alternative hypothesis which posits that recombination suppression at the ACR is caused by a DNA rearrangement immediately after (or as a consequence of) polyploidization was supported by evidence obtained from *P. simplex* and *P. notatum* (Pupilli et al., 2001; Urbani et al., 2002; Stein et al., 2004; Podio et al., 2012b). Moreover, loss of pairing after local chromosome rearrangement was also reported in other apomictic species such as *Pennisetum squamulatum* (Ozias-Akins et al., 1998) and *Cenchrus ciliaris* (Goel et al., 2003). However, the non-recombining ACR of *Paspalum* appears relatively modest in size if compared with other models (Roche et al., 2002) as single apomixis-linked bacterial artificial chromosome (BAC) clones were identified by multiple markers that were independently developed (Calderini et al., 2011).

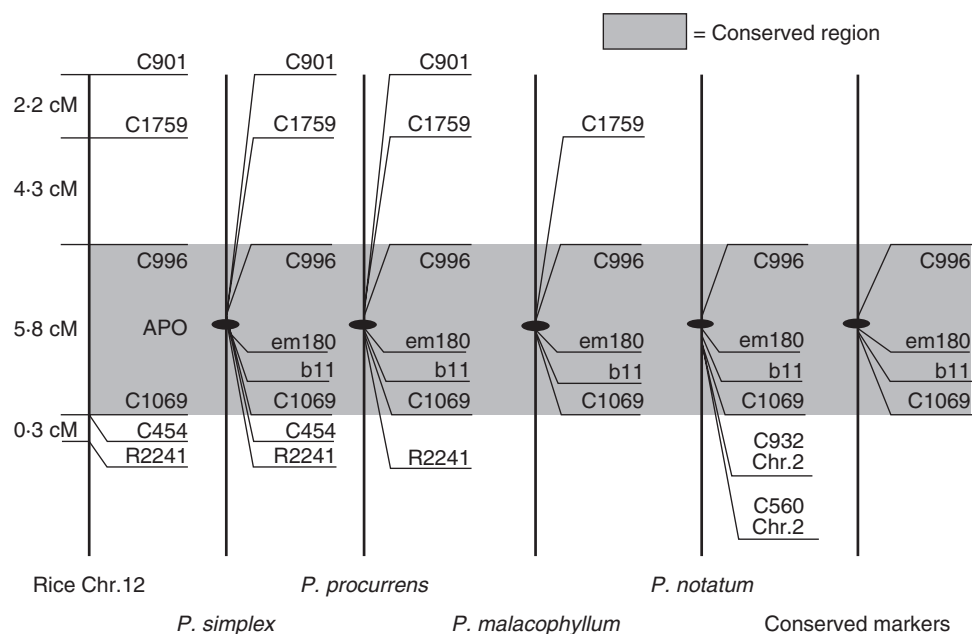

FIG. 3. Conservation of apomixis-linked markers in four *Paspalum* species in relation to their position on the homoeologous rice chromosome counterpart. The markers included in the highlighted area are conservatively linked to apomixis in the four *Paspalum* species considered.

*Fine structure of the ACR inferred from sequencing of an apomixis-related BAC and of molecular markers completely linked to the trait*

The apomixis-linked BAC clone 346H10, isolated from a genomic BAC library of apomictic *P. simplex*, was shotgun-sequenced at 10× coverage (Calderini *et al.*, 2006, 2011). Annotation of the 129 046 bp revealed approx. 10 % non-coding sequences, 13 sequences related to transposons (i.e. ping/pong/SNOOPY, En/Spm and mariner sub-classes) and retrotransposons (i.e. ty3-gypsy and ty1-copia sub-classes) and four putative genes matching at high similarity (e-values  $\leq^{-34}$ ) with known genes. Of these genes, two that co-segregated with apomixis in several *Paspalum* species were considered as good candidates for apomixis (Calderini *et al.*, 2006). Functional annotation showed that they encode a protein with significant homology with a protein kinase domain (Ps-PKD) and a protein of the ERD1/XPR1/SYG1 family (Ps-EXS). Detailed comparative analysis of *Ps-PKD* and its rice homologue is shown in Fig. 4. Both large- and small-scale rearrangements occurred in the structures of *Ps-PKD* compared with its rice homologue, which was assumed to represent the sexual counterpart of the apomixis-linked alleles of *Paspalum*. Large-scale rearrangements mainly due to insertions of transposable elements (TEs), probably resulting in aberrant transcription patterns (i.e. multiple independent transcriptional units or long chimeric mRNAs), were observed. Small-scale rearrangements included a 110 bp

duplication, frequent small deletions, and occasional point mutations creating premature stop codons (Fig. 4). The mRNA resulting from transcription of this gene is probably unable to be translated into a protein. A similar gene structure including deletion of some exons compared with the homologous rice sequence and loss of coding capacity was detected in the second candidate sequence *Ps-EXS* (Calderini *et al.*, 2006).

In *P. notatum*, characterization of the ACR by sequencing of a group of molecular markers completely linked to apospory revealed the presence of both low and high copy number sequences including *Ty1*-copia retroelements (Podio *et al.*, 2012a). Interestingly, one sequence (*Pn-GSA3*) obtained by chromosome walking from one marker mapped in the ACR showed high similarity with maize and rice loci encoding MT-A70-like (mRNA *N*<sup>6</sup>-adenosine-methyltransferase) family proteins. Functional roles of these candidates in apomictic reproduction are discussed in the section ‘Candidate and downstream genes identified by large-scale sequencing analysis’.

### COMPARATIVE TRANSCRIPTOMICS

#### *Transcriptomic landscapes: towards the identification of candidates*

The characterization of the *Paspalum* ACR in *P. notatum* and *P. simplex* revealed a strong repression of recombination and, probably as a consequence, accumulation of repetitive elements and non-coding DNA disrupting map collinearity with the

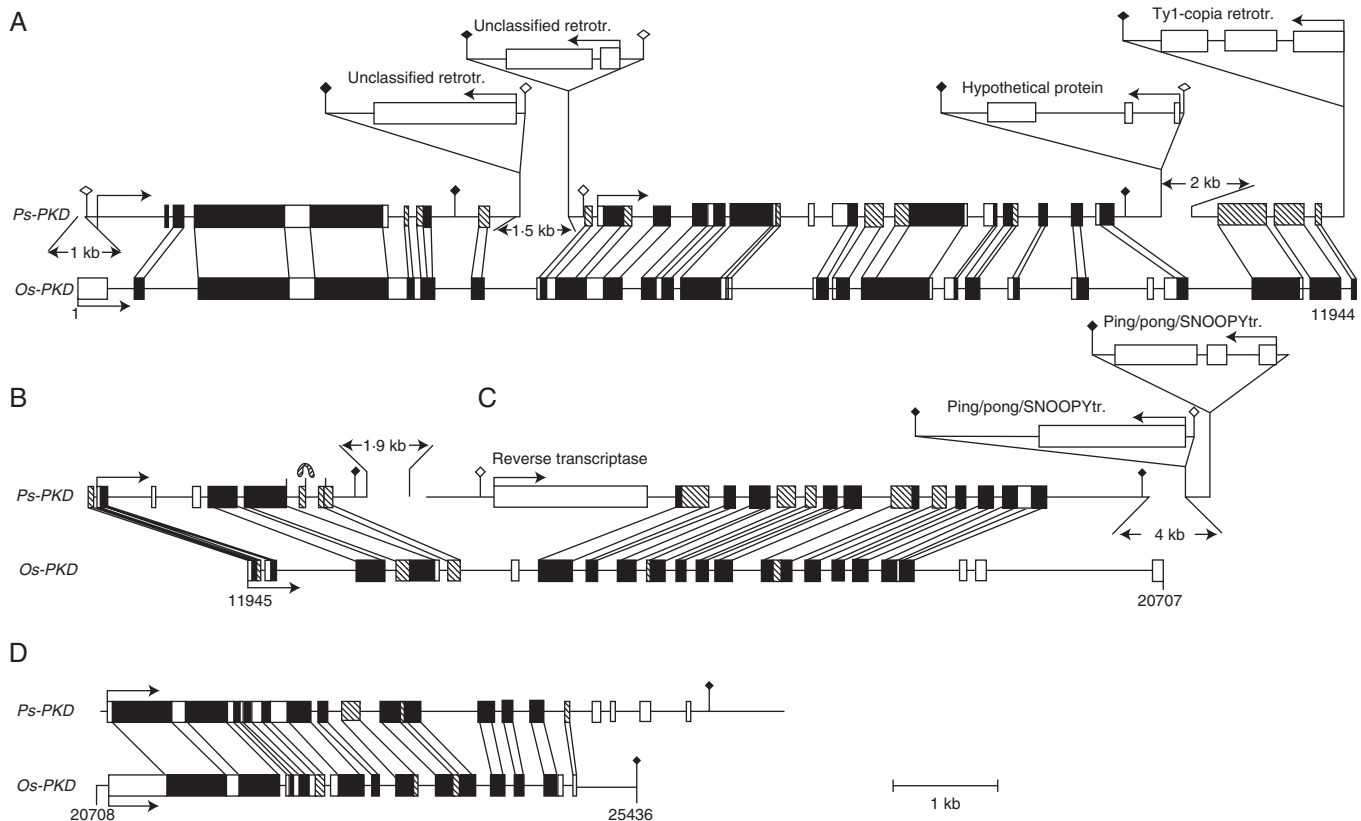

FIG. 4. Microcollinearity of the *Ps-PKD* gene of *P. simplex* with its rice homologue *Os-PKD*. (A–D) Four non-overlapping contigs. Homologous areas are connected by vertical lines, arrows indicate the gene orientation and position of the first exon, black and white boxes indicate homologous coding and non-homologous coding regions, respectively, while dashed boxes indicate homologous non-coding regions. Open and filled rhombuses indicate putative initiations of transcription and polyadenylation sites, respectively. The curved arrow in (B) indicates a 110 bp duplication (the figure is reproduced from Calderini *et al.*, 2006, with permission).

homologous region on rice chromosome 12 (Calderini *et al.*, 2006). Although several candidates were identified, the difficulties in the assembly of a considerable amount of sequences composed mainly of repetitive elements prompted groups researching apomixis in *Paspalum* to adopt a two-step approach to enhance the probabilities of identifying the genetic determinants of the trait. This is based on: (1) the identification of differentially expressed transcripts in reproductive organs of apomictic and sexual plants; and (2) mapping the differentially expressed transcripts, to restrict the number of candidates to the ACR-linked genes. Comparative transcriptomic analysis of apomixis in *Paspalum* faced several major drawbacks common in apomictic systems: (a) the lack of genuine near-isogenic apomictic and sexual lines; (b) the fact that apomictic species are highly heterozygous, thus complicating data interpretation; and (c) the lack of microarray reference systems allowing high-throughput analyses of gene expression. However, mRNA profiling assays based on differential display and cDNA-AFLP were carried out to overcome these difficulties and generate new data for describing transcriptomic landscapes in reproductive tissues of sexual and apomictic *Paspalum* spp.

In *P. notatum*, differential display was first carried out to explore differences between mRNA bulks obtained from immature inflorescences of sexual and apomictic plants. This approach led to the identification of a transcript annotated as containing a KPS multiphosphorylation domain previously detected in several *cdc2*-regulated cytoskeletal proteins and highly expressed during early megagametophyte development in apomictic plants (Pessino *et al.*, 2001). This approach was further completed by a more comprehensive analysis taking advantage of the reproductive calendar proposed by Laspina *et al.* (2008) according to which mRNA was extracted from spikelets at stage I, i.e. immediately prior to AI development. Differential display experiments allowed the identification of 65 DETs (differentially expressed tags) selected as expressed in only one of the plants (apomictic or sexual; Laspina *et al.*, 2008). Further characterization showed that 45 DETs were protein-coding fragments, while the remainder were homologous to retroelements and putative microRNA precursors (Laspina *et al.*, 2008; Ochogavía *et al.*, 2011). Quantitative and/or spatial differential expression was confirmed for ten selected DETs using real-time PCR and/or *in situ* hybridization. In order to select candidates of interest for the molecular characterization of apomixis, the DETs were mapped *in silico* on the rice chromosomes (Laspina *et al.*, 2008). Distribution was strongly biased toward chromosome 2 but not chromosome 12 (12 and four transcripts, respectively, compared with 6.8 transcripts per chromosome on average). Moreover, some of the DETs mapping *in silico* onto rice chromosomes 2 and/or 12 were experimentally mapped in *P. notatum*, but none of them co-segregated strictly with apomixis, suggesting that these could be downstream-acting genes rather than the genetic determinants of the trait (Laspina *et al.*, 2008; Felitti *et al.*, 2011; Ochogavía *et al.*, 2011). Interestingly, some DETs were classified as TEs carrying transduplicated segments of genes previously associated with apomictic development (*SERK*, *CYT*, *P450*), suggesting that they might regulate the expression of these genes through mechanisms involving transcriptional and/or post-transcriptional gene silencing (Ochogavía *et al.*, 2011). A total of 202 DETs were identified in *P. simplex*

by cDNA-AFLP profiling using mRNA samples collected at several stages of development in *P. simplex* (Polegri *et al.*, 2010). The majority of them were expressed exclusively at specific stages of the apomictic development or were misregulated, as temporal ectopic expression could be observed in apomictic genotypes. In contrast to DETs obtained in *P. notatum*, *in silico* mapping onto the rice genome showed no bias towards chromosomes 12 or 2. Interestingly, despite the high density of TEs in the ACR (Calderini *et al.*, 2006), only a few DETs showed homology with these elements, suggesting that many of the apomixis-linked TEs are transcriptionally silent.

Identifying common features in transcriptomic analysis of related apomictic species is extremely useful to identify key conserved steps in apomictic development. The most evident similarity is the ontology classes to which the candidates correspond. In both species, the main classes were ‘signal transduction’, ‘nucleic acid binding’, ‘protein metabolism’, ‘transcription’ and ‘transport’ (Fig. 5). Interestingly, several DETs belong to the same annotation classes including extensins (*P. simplex* E1/124-6 and *P. notatum* N31), yoda-like MAP3Ks (*P. simplex* A/148-3 and *P. notatum* N46), LRR-like proteins (*P. simplex* A/124-3, *P. notatum* N78 and *P. notatum* N79) transferase proteins (*P. simplex* C1/121-7 and *P. notatum* N91) and retrotransposon proteins (*P. simplex* A/121-1, *P. simplex* E/120-1 and *P. notatum* N92) (Laspina *et al.*, 2008; Polegri *et al.*, 2010). All of these belong to *P. simplex* DET sub-classes that were differentially expressed between apomictic and sexual flowers at early developmental stages, because this was the only developmental stage analysed in *P. notatum*.

Finally, a remarkable correlation was observed between the identity of genes modulated during reproductive development in *P. simplex/P. notatum* (Laspina *et al.*, 2008; Polegri *et al.*, 2010) and those regulated during autopolyploidization in *P. notatum* (Martelotto *et al.*, 2005). Several common annotations were detected between the *P. simplex* apomixis-associated candidates and the *P. notatum* ploidy-regulated ones: *P. simplex* B4/120-3 and *P. notatum* DDT13522x2 corresponded to glucose 6P-P translocators; *P. simplex* B4/122-1 and *P. notatum* DDT13682x to F-box proteins; *P. simplex* D4/153-8 and *P. notatum* DDT32844x1 to ubiquitin-conjugating enzymes; *P. simplex* B4/137-2 and *P. notatum* DDT43722x2 to chitinases; and *P. simplex* A/148-4 and *P. notatum* DDT43964x1 to DNAJ domain-containing proteins. Moreover, *P. notatum* apomixis-associated sequences N7 (unknown), N14 (ribosomal protein S12), N16 (acetolactate synthase) and N108 (transposon protein) corresponded to ploidy-regulated sequences DDT32852x1, DDT32834x2, DDT32774x2 and DDT32884x, respectively, in BLAST2seq searches (Laspina *et al.*, 2008).

These observations imply that a considerable number of sequences involved in apomictic development are transcriptionally modulated by a change in ploidy. These sequences may represent the molecular link between apomixis and polyploidy. The presence of at least one of these sequences mapping onto the *P. simplex* ACR (*P. simplex* A/148-4 DNAJ domain-containing protein) was previously confirmed by RFLP mapping (Polegri *et al.*, 2010). This sequence belonged to class A, whose members are constitutively expressed at low levels in apomictic individuals, indicating that gene de-regulation, polyploidization and apomixis are closely inter-related phenomena.

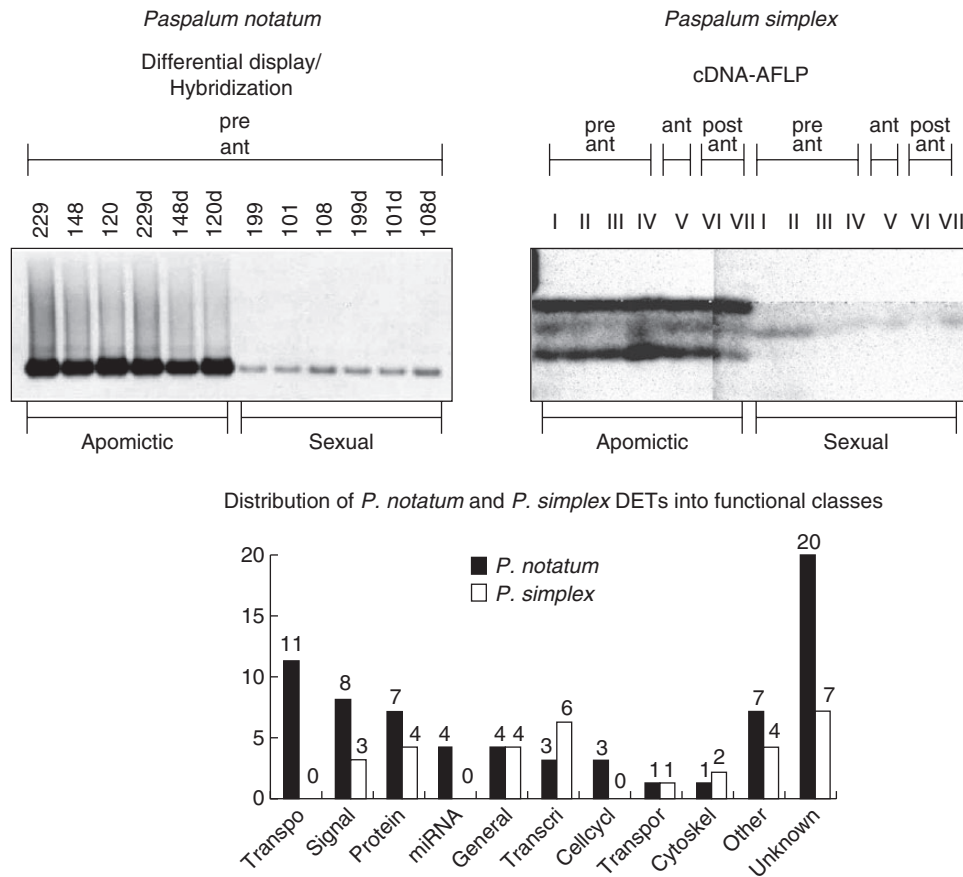

FIG. 5. Characterization of apomixis-associated DETs identified by transcriptomic analysis in *Paspalum* genotypes. Top left: a representative example of DET (apo417/N114) identified in *P. notatum* flowers at late pre-meiotic/meiotic stage by differential display experiments. Differential display amplicons originating from three apomictic and three sexual  $F_1$  plants (in duplicate) were transferred to nylon membranes and hybridized with an N114 probe labelled with digoxigenin (Pessino *et al.*, 2001). Top right: a representative example of a Class A DET identified in *P. simplex* flowers by cDNA-AFLP analysis at pre-anthesis, anthesis and post-anthesis stages (Polegri *et al.*, 2010). Bottom: histogram representing the relative occurrence of DETs belonging to particular ontology classes in *P. notatum*, as identified from DD experiments and in *P. simplex*, as identified from cDNA-AFLP experiments. Ontology classes (from left to right): transposon/retrotransposon, signal transduction, protein metabolism, miRNA precursors, general metabolism, transcription, cell cycle, transport, cytoskeleton, other, unknown.

#### Possible causes of expression deregulation at the ACR

The transcription deregulation observed in the ACR could be due to its highly rearranged nature. In *P. notatum*, a major rearrangement, possibly an inversion or a translocation, was reported in some apomictic genotypes (Stein *et al.*, 2004; Podio *et al.*, 2012b). In *P. simplex*, an apomixis-linked BAC was characterized by the presence of large and small indels, translocations and TE insertions (Calderini *et al.*, 2006). All of these rearrangements can deregulate transcriptional activity. Genetic rearrangements following gene migration or the inversion/translocation of large chromosomal areas can relocate genes near *cis*-regulatory elements that can deregulate their transcription or they can move away boundary elements, allowing heterochromatin to invade new areas.

The *Paspalum* ACR is plagued with abundant TEs (Calderini *et al.*, 2006; Podio *et al.*, 2012a). Expression deregulation at the ACR could be mediated by these repetitive elements by several mechanisms. TEs may contain sequences that bind a regulator protein or, once inserted, they may create new binding sites that act as transcriptional regulators (Lerat and Sémon, 2007).

Alternately, TE insertion may induce gene inactivation and affect gene transcription via a mechanism similar to the random inactivation model for the neo-Y genes proposed in *Drosophila miranda* (Bachtrog, 2006). According to this model, genes located in a recombinationally repressed area are inactivated by random insertion of TEs, and these mutations induce downregulation of the Y-linked genes. In the *Paspalum* system, a general downregulation of apomixis-linked genes compared with their sexual homologues was noticed (Polegri *et al.*, 2010). Recently, a central role for silencing involving retrotransposons in determining gametic fate was reported in *Arabidopsis thaliana* (Olmedo-Monfil *et al.*, 2010). Inactivation of the *A. thaliana* gene *At-AGO9* decreased the generation of retrotransposon-related small interfering RNAs (siRNAs) and induced the formation of multiple non-reduced ESs within the nucellus. This phenotype strongly resembled apospory (Olmedo-Monfil *et al.*, 2010). *At-AGO9* predominant TE targets were located in the pericentromeric regions of all five *Arabidopsis* chromosomes, suggesting a link between the *At-AGO9*-dependent siRNA pathway and heterochromatin formation (Durán-Figueroa and Vielle-Calzada, 2010). A similar

apospory-like phenotype was induced in maize by inactivating the DNA methyltransferases Zm-DMT102 and Zm-DMT103 (García-Aguilar *et al.*, 2010). Taken together, the mutant phenotypes *ago9* in arabidopsis and *dmt103* in maize suggest that retrotransposon-mediated siRNA generation and DNA methylation pathways control the switch between apomictic and sexual reproduction. Considering the possible role of retrotransposon-mediated silencing in the regulation of sexual reproduction revealed for the model species, the functional analysis of ACR-linked candidates in natural apomictic plants should be redirected. Future work in the genus *Paspalum* should be oriented not only to phenotypic analysis of null and gain-of-function mutants of protein-coding candidates, but also to determine how altered retroelement activity within the ACR could influence gene expression and condition the fate of the female gametes in natural apomictic species.

Studies of synthetic allopolyploids have revealed that the genomic response to allopolyploidy usually involves (retro)transposon mobility, sequence rearrangements and losses, DNA methylation changes and chromatin remodelling. All of these features have a significant effect on gene silencing and up- or downregulation of the duplicated genes (Adams and Wendel, 2005).

Martelotto *et al.* (2007) showed that polymorphisms between diploids and their polyploid counterparts were mainly related to band loss and retrotransposon mobilization, and that sequence modifications associated with polyploidization occurred at cytosine-methylated regions, although the genetically modified regions remained identically methylated after polyploidization. Similarly, Rodríguez *et al.* (2012) reported no differences in the average proportions of methylated CCGG sites between diploid and tetraploid cytotypes of *P. notatum*, but methylation patterns were significantly more variable in the tetraploids, and sequence analysis of new epialleles which emerged after polyploidization revealed homology with TEs.

To determine which genes were regulated by ploidy, a comparative transcriptome analysis was conducted in flowers of sexual diploid and tetraploid *P. notatum* genotypes (Martelotto *et al.*, 2005). The 64 validated clones showing differential expression between diploid and tetraploid sexual cytotypes belonged to the following ontology classes: (1) chromatin remodelling; (2) protein trafficking, folding and degradation; (3) carbohydrate and lipid metabolism; (4) cell cycle regulation; (5) transcription; and (6) signal transduction. Interestingly, several of the genes regulated by ploidy had identical annotations regarding other differentially modulated genes during apomictic development (see the previous section ‘Transcriptomic landscape: towards the identification of candidates’ for details).

To sum up, the genome of *Paspalum* is genetically modified at regions encoding retrotransposons probably as a consequence of polyploidization; this modification in turn modulates the representation of protein-coding transcripts through an unknown mechanism (Martelotto *et al.*, 2005, 2007; Rodríguez *et al.*, 2012). Interestingly, several families of retroelements carrying transduplicated segments of genes, some of which are associated with apomixis, were described in *P. notatum*, suggesting that the molecular pathways involved in reproduction can be affected by polyploidization at specific levels (Ochogavía *et al.*, 2011).

## FURTHER STRATEGIES FOR MINING APOMIXIS GENES IN *PASPALUM* SPP.

### *Candidates genes identified by large-scale sequence analyses*

Comparative molecular genetic analysis of the ACR in *Paspalum* has shown that a restricted region homologous to a specific chromosome area of rice was conservatively linked to apomixis in several *Paspalum* spp. (Pupilli *et al.*, 2004; Hojsgaard *et al.*, 2011; Fig. 3). Large-scale sequencing of this conserved region and of DETs mapped in the same area should disclose genes that on the basis of their homology with other genes of known function are worth considering as candidate genetic determinants of apomictic reproduction in *Paspalum*. Here we report and discuss some of these genes.

As a first example, consider the case of *Ps-EXS* (Calderini *et al.*, 2006). Proteins containing the EXS motif include: (1) SYG1, a signal transduction protein that in *Saccharomyces cerevisiae* was associated with the G-protein; (2) sequences thought to be murine leukaemia virus receptors (XPR1) (Battini *et al.*, 1999); and (3) ERD1 proteins, involved in the localization of endogenous endoplasmic reticulum proteins in *S. cerevisiae* (Hardwick *et al.*, 1990). Deletion mutants of SYG1 protein can suppress cell cycle arrest and differentiation in yeast, and the suppression capacity is related to the loss of specific portions of the gene (Spain *et al.*, 1995). The same authors hypothesized that one of these deletion mutants (Syg1Δ340p) can promote cell division in otherwise arrested (differentiated) cells. Compared with the *Os-EXS* gene structure, *Ps-EXS* lacks some rice exons entirely and coding capacity in others, suggesting a possible mechanism in which deleted (or rearranged) supernumerary copies of genes involved in sexual development can reprogramme differentiated cells into the apomictic developmental process.

The alignment of the apomixis-linked clone *Pn-MAI3* of *P. notatum*, extended by chromosome walking, showed significant homology with a maize cDNA related to an  $N^6$ -adenosine-methyltransferase (MT-A70; Podio *et al.*, 2012a). This enzyme catalyses the  $N^6$ -adenosine methylation in nascent mRNA and was shown to play key roles in cell fate decision in multiple eukaryote systems (Jia *et al.*, 2012). MTA-70 expression in *A. thaliana* is associated with dividing tissues, as inactivation of this enzyme leads to failure of the developing embryo to progress past the globular stage (Zhong *et al.*, 2008). MT-A70 in *Paspalum* might play a role in one or more aspects of apomictic development, i.e. the parthenogenetic development of the unreduced egg cell.

To date, transcriptional surveys have identified several candidates which can play a role either as genetic determinants or as downstream players in (depending on their co-segregation or less with apomixis, respectively) apomictic reproduction in *Paspalum*. An interesting candidate is represented by the *Pn-N46* clone which showed homology to a gene belonging to the mitogen-activated protein kinase (MAP3K) gene family and was identified as differentially expressed in apomictic and sexual flowers of *P. notatum*. The arabidopsis predicted orthologue to *n46*, At1g53570, belong to a gene family formed by 12 members (Ichimura *et al.*, 2002). Of these, *YDA*, which was reported to be more closely related to At1g53570, promotes the zygote elongation and suspensor development in arabidopsis (Lukowitz *et al.*, 2004). In flowers of *P. simplex*, an apomixis-specific allele

homologous to *Pn-n46*, constitutively expressed across all the developmental stages taken into account, was also identified (Polegri *et al.*, 2010). It could be that *n46* may have a role in the parthenogenetic development of the embryo in both species.

Another remarkable candidate as a downstream acting gene is the *P. notatum* clone N20, homologous to a *LORELEI*-family member, which was overexpressed in apomictic plants relative to sexual plants at pre-meiosis, post-meiosis and anthesis (maximal expression) but downregulated at meiosis (Lasпина *et al.*, 2008; Felitti *et al.*, 2011). Curiously, arabidopsis null mutants for the *At-LORELEI* (At4g26466) gene showed impaired sperm cell release into the egg cell (Capron *et al.*, 2008). The fact that egg cell fertilization is generally absent in *P. notatum* apomictic plants (embryos are formed through parthenogenesis) but the central cell is fertilized to produce the endosperm, suggests an active mechanism involving *LORELEI*-family members, which might operate to prevent fertilization in apomictic plants (Felitti *et al.*, 2011).

Another likely downstream-acting gene, showing homology to the member 1 of the AUXIN-RESPONSE FACTOR family proteins (ARF-1), was identified in *P. simplex* by Polegri *et al.* (2010). These proteins are transcription factors that regulate the expression of auxin-responsive genes in both activation and repression modes (Guilfoyle and Hagen, 2007). The developmental fate of non-reproductive cells has been switched in female gametophytes of arabidopsis by manipulating auxin response genes (Pagnussat *et al.*, 2009). A homologue of arabidopsis *At-ARF1* was expressed early in *P. simplex* apomictic ovule formation, suggesting that the auxin response may affect the differentiation of AIs from nucellar cells. *Ps-ARF1* may repress a class of auxin-responsive genes that maintain the undifferentiated state of nucellar cells once the MMC is formed.

An example of a structural gene whose expression might be influenced by the upstream genetic determinants of apomixis are  $\alpha$ -zeins, which are seed-storage proteins whose accumulation in the endosperm is developmentally regulated at the transcriptional level (Sabelli and Larkins, 2009). Apomictic flowers of *P. simplex* began to accumulate zein-homologue transcripts about 5 d after pollination, while those transcripts were absent in sexual flowers (Polegri *et al.*, 2010). In particular, the transcription of zein homologues in *P. simplex* may begin earlier in apomictic endosperm than in sexual endosperm. Because parthenogenetic embryos do not need fertilization, embryo development in apomictic plants could be accelerated compared with their sexual counterparts, and fast-developing embryos could send positive signals to the central cell of the ES, which is then 'primed' for faster cell cycle activity. These signals might include those committing to earlier storage protein accumulation.

#### *Gene transfer as a definitive tool to validate candidate apomixis genes*

Functional analysis of the selected candidate genes would require the establishment of an efficient transformation system in *Paspalum*. In the last few years, several biolistic transformation protocols were reported for *P. notatum* (Grando *et al.*, 2002; Smith *et al.*, 2002; Gondo *et al.*, 2005). More recently *P. notatum* has also been used as a model system to assess the risk of pollen-mediated transgene flow in the field (Sandhu *et al.*, 2009, 2010). Our research group adapted these protocols

for use on sexual and apomictic tetraploid genotypes (unpublished results). In the next few years, we expect to produce a number of transformants with modified expression of several candidate genes related to apospory. The introduction of apomixis by *de novo* engineering will require the identification of candidate genes, the isolation of promoters that control gene expression spatially and temporally, and the development of technologies to introduce the transgenes (Grossniklaus, 2001). Although some species have evolved complex mechanisms to control apomixis, this trait could be engineered through a synthetic approach targeting the key regulatory steps: non-reduction, parthenogenesis and seed development. Genes controlling each step should be identified and regulated to produce a synthetic apomict. Endosperm development is a crucial challenge (Savidan, 2001). A balanced maternal:paternal genome ratio (2m:1p) is an absolute requirement for endosperm development in cereals, due to specific imprinting of gametic nuclei. Deviation from this ratio leads to embryo abortion or seeds with diminished fertility. Therefore, detailed knowledge on the behaviour of genes controlling autonomous endosperm development might be necessary to introduce apomixis into sexual crops. Promising results have already been obtained in arabidopsis; a combination of maternal hypomethylation with loss of *fie* function led to the development of endosperm without fertilization (Vinkenoog *et al.*, 2000). To date, several promoters have been described that are active in the ovule or the gametophyte (Yu *et al.*, 2005; Nain *et al.*, 2008; Dwivedi *et al.*, 2010). However, the choice of the promoter for transformation strategies to produce an artificial apomict would depend on the temporal and spatial expression patterns of the particular candidate gene targeted, and therefore should be selected on an individual basis. All these aspects should be taken into account when attempting to develop an apomixis system for crops without closely related apomictic relatives. Wild apomictic systems with sexual and asexual cytotypes could serve as models to understand the complex functional network of gene–gene communications that could transform a sexual plant into an asexual one after it has received an apomixis-controlling locus.

## CONCLUDING REMARKS

Transferring apomixis to economically important crops could have enormous benefits for agriculture, making understanding the molecular mechanisms of this trait of outstanding importance in agricultural biotechnology. The manipulation of the trait is currently having a direct impact on the breeding of natural apomictic forage grasses, allowing a potential increase in cattle production in tropical, sub-tropical and temperate areas. Moreover, the possibility to clone superior genotypes and hybrids of crops such as maize, rice, wheat and soybean could greatly benefit farmers, allowing them to sustain high yields over many years by planting a sub-set of their harvested seed, without losses due to recombination and/or segregation. New interspecific and intergeneric hybrids could be obtained and propagated, allowing the development of genotypes better adapted to the different environments. Apomixis would also facilitate the use of transformants, considering that an apomictic transgenic plant would immediately fix the new trait and become a cultivar after multiplication. Thus far, introgression of apomixis into crops from wild relatives has failed. Introducing the trait through genetic engineering is not



yet viable, mainly because the apomixis determinants remain unknown. Loci controlling apomixis in natural apomicts are often large, complex and, in some cases, recalcitrant to recombination-based mapping approaches, all of which hinder candidate identification and, therefore, transgenesis-based breeding programmes. Impressive progress has been made in identifying genes mimicking some elements of apomixis in arabidopsis (Ravi *et al.*, 2008; Olmedo-Monfil *et al.*, 2010) and maize (García-Aguilar *et al.*, 2010; Singh *et al.*, 2010). Arabidopsis artificial plants producing partial clonal progeny have been obtained (Marimuthu *et al.*, 2011). Although these plants cannot be defined as genuine apomictic genotypes because they still rely on crossing to express full maternal inheritance, these constitute the first proof of principle of the possibility to develop a synthetic apomictic system in a diploid sexual species. In our view, unravelling the apomixis enigma will require the implementation of three inter-related approaches that should be combined to develop an apomixis system suitable for each target crop. First, forward genetics should be carried out in the closest-relative apomictic model to target the crop to look for promising mutations. Secondly, related genes should be validated in natural apomicts and model sexual species by reverse engineering; and, thirdly, the new information and tools should be combined to introgress validated genes into target crops. Genetic affinity between target and model is crucial, as gene networks controlling complex traits are not always conserved.

The genetic variability of the genus *Paspalum* is currently being exploited via sexual hybridization followed by apomictic fixation of successful polyploid genotypes. If this potential could be harnessed in full, considerable advances could be made not only in *Paspalum* breeding but also in other species with both sexual and asexual modes of reproduction. However, in our view, the major impact of research on *Paspalum* is and will be related to its role as a model system to mine apomixis genes and to develop an apomixis system for major crops. *Paspalum* provides a unique opportunity to identify the apomixis determinants, because its ACR is smaller than that of other apomictic systems. Moreover, its relatively small genome avoids the problems related to gene redundancy when performing functional analysis of candidate genes. In addition, the availability of multiple apomixis-segregating populations derived from different parent combinations narrows the portion of the ACR that carries the genetic determinant(s) for apomixis, enabling the genes that have been screened out by speciation to be discarded as apomixis candidates. The functional constraint of the 2:1 female:male parental genome contribution to the endosperm and the need to introgress apomixis in diploid backgrounds are major drawbacks to introducing apomixis in crop species. In both cases, *Paspalum* species show promising features (i.e. a tendency to yield viable hybrid seeds from parental lines of various ploidy levels and the presence of some elements of apomixis in diploids) that should be further studied. Further research is needed to define the relationships between structure, position and function of the known apomixis-linked genes. Many of these genes are pseudogenes characterized by a deregulated constitutive expression, but questions remain. (1) Are all of the genes in the ACR pseudogenes? (2) Is their constitutive expression related to their pseudogene nature? Although pseudogene expression might be related to silencing of their sex-related homologues, the presence of some genes that act as positive activators

of apomixis cannot be ruled out. Other relevant issues are the epigenetic landscape and the proliferation of retrotransposon sequences in the ACR: (3) are these repetitive sequences simply accumulating in a heterochromatic chromosomal sector with impaired coding and functional capacity without any selective constraints, or (4) could these sequences be controlling transcription of neighbouring genes/pseudogenes and therefore influencing expression of sequence-related functional gene members? There is mounting evidence in model species that at least some elements of apomixis are under epigenetic control. Analysis of TE activity, DNA methylation and chromatin remodelling in the ACR will enhance knowledge on epigenetic regulation of apomixis. Whole-genome epigenetic analyses of DNA methylation and chromatin remodelling will clarify the complex network of gene interactions, perhaps mediated by TEs that silence sex-related genes and trigger the positive effectors of apomixis.

Major constraints for the identification of genes involved in apomixis in *Paspalum* as well as in other natural apomictic systems are due to the small size, rare abundance and inaccessibility of the cells within the ovule and the substantial amount of sequencing efforts needed at both the genomic and transcriptomic levels. We believe that modern tools of molecular and cell biology should be used to restrict the number of cells to be analysed to eliminate unspecific background on the one hand and to give a comprehensive global view of the gene action across all stages of apomictic development on the other. In this perspective, the newly developed laser-assisted microdissection procedures coupled with linear amplification of mRNA can provide useful information on genes acting on decision fate at the level of a single or a few cells. High-throughput sequencing procedures of linearly amplified mRNA adapted to organisms for which a reference genome is not yet available should then be used to obtain a global transcriptomic platform of developing tissues.

Apomixis is a fascinating research field. Many of its features are simultaneously intriguing and complex to elucidate. The benefits to be derived from controlling apomixis are promising and the trait has been described as ‘the holy grail of agriculture’, ‘the plant breeders’ dream’ and ‘the second green revolution’. The evidence summarized here indicates that *Paspalum* constitutes a very interesting system to study the physiological, genetic, evolutionary, ecological and agronomical aspects of apomixis and that research on this model has and will contribute significantly to understanding and harnessing this important trait.

#### ACKNOWLEDGEMENTS

We thank Florencia Galdeano of the Instituto de Botánica del Nordeste (CONICET-UNNE) for technical assistance; Dr Thomas Giesecke for helping us with the German translation of Renner’s original work, and Dr Gabriel Rua for valuable suggestions on the systematics of the genus. The authors would like to thank the anonymous reviewers for their constructive criticism that helped to improve the manuscript. This work was supported by the Agencia Nacional de Promoción Científica y Tecnológica, Argentina [PICT 2007 no. 00476]; Consejo Nacional de Investigaciones Científicas y Técnicas (CONICET), Argentina [PIP 112-200801-01378]; Facultad de Ciencias Agrarias-UNNE, Universidad Nacional de Rosario, Argentina

[AGR189]; and by the Italian Ministero degli Affari Esteri, Direzione Generale per la Promozione e la Cooperazione Culturale (L401/1990) for the project 'Isolation of genetic determinants of apomixis in *Paspalum simplex*' (Italy–Argentina bilateral agreement, 2006–2007).

## LITERATURE CITED

- Actkinson JM, Burson BL. 1999. Cytogenetic relationships between *Paspalum pubiflorum* and three South American *Paspalum* species. *International Journal of Plant Sciences* **160**: 775–781.
- Acuña CA, Blount AR, Quesenberry KH, Hanna WW, Kenworthy KE. 2007. Reproductive characterization of bahiagrass germplasm. *Crop Science* **47**: 1711–1717.
- Acuña CA, Blount AR, Quesenberry KH, Kenworthy KE, Hanna WW. 2009. Bahiagrass tetraploid germplasm: reproductive and agronomic characterization of segregating progeny. *Crop Science* **49**: 581–588.
- Acuña CA, Blount AR, Quesenberry KH, Kenworthy KE, Hanna WW. 2011. Tetraploid bahiagrass hybrids: breeding technique, genetic variability and proportion of heterotic hybrids. *Euphytica* **179**: 227–235.
- Adams KL, Wendel JW. 2005. Polyploidy and genome evolution in plants. *Current Opinion in Plant Biology* **8**: 135–141.
- Agharkar M, Lomba P, Altpeter F, Zhang H, Kenworthy K, Lange T. 2007. Stable expression of *AtGA2ox1* in a low-input turfgrass (*Paspalum notatum* Flüggé) reduces bioactive gibberellin levels and improves turf quality under field conditions. *Plant Biotechnology Journal* **5**: 791–801.
- Aguilera PM, Sartor ME, Galdeano F, Espinoza F, Quarín CL. 2011. Interspecific tetraploid hybrids between two forage grass species: sexual *Paspalum plicatulum* and apomictic *P. guenoarum*. *Crop Science* **51**: 1544–1550.
- Altpeter F, James VA. 2005. Genetic transformation of turf-type bahiagrass (*Paspalum notatum* Flüggé) by biolistic gene transfer. *International Turfgrass Society Research Journal* **10**: 1–5.
- Asker SE, Jerling L. 1992. *Apomixis in plants*. Boca Raton, FL: CRC Press.
- Bachtrog D. 2006. Expression profile of a degenerating neo-y chromosome in *Drosophila*. *Current Biology* **16**: 1694–1699.
- Banks DJ. 1964. Cytological studies in *Paspalum*, group Setacea (Gramineae). *Sida* **1**: 306–312.
- Banks DJ. 1966. Taxonomy of *Paspalum setaceum* (Gramineae). *Sida* **2**: 269–284.
- Bashaw EC, Forbes I. 1958. Chromosome numbers and microsporogenesis in Dallisgrass: *Paspalum dilatatum* Poir. *Agronomy Journal* **50**: 441–445.
- Bashaw EC, Holt EC. 1958. Megasporeogenesis, embryo sac development and embryogenesis in Dallisgrass, *Paspalum dilatatum* Poir. *Agronomy Journal* **50**: 753–756.
- Bashaw EC, Hovin AW, Holt EC. 1970. Apomixis, its evolutionary significance and utilization in plant breeding. In: Norman MJT, ed. *Proceedings of the 11th International Grasslands Congress*. Surfers Paradise: Australia University of Queensland Press, 245–248.
- Battini JL, Rasko JA, Miller AD. 1999. A human cell-surface receptor for xenotropic and polytropic murine leukemia viruses: possible role in G protein-coupled signal transduction. *Proceedings of the National Academy of Sciences, USA* **96**: 1385–1390.
- Bennett HW, Bashaw EC. 1966. Interspecific hybridization with *Paspalum* spp. *Crop Science* **6**: 52–58.
- Bicknell RA, Borst NK, Koltunow AM. 2000. Monogenic inheritance of apomixis in two *Hieracium* species with distinct developmental mechanisms. *Heredity* **84**: 228–237.
- Blount AR, Acuña CA. 2009. Bahiagrass. In: Singh RJ, ed. *Genetic resources, chromosome engineering, and crop improvement series: forage crops*. Boca Raton, FL: CRC Press, 81–102.
- Bonilla JR, Quarín CL. 1997. Diplosporous and aposporous apomixis in pentaploid *Paspalum minus*. *Plant Science* **127**: 97–104.
- Bradley JE, Carman GC, Jamison MS, Naumova TM. 2007. Heterochronic features of the female germline among several sexual diploid *Tripsacum* L. (*Andropogoneae*, *Poaceae*). *Sexual Plant Reproduction* **20**: 9–17.
- Brown WV, Emery HP. 1958. Apomixis in the Gramineae: Panicoideae. *American Journal of Botany* **45**: 253–263.
- Burson BL. 1975. Cytology of some apomictic *Paspalum* species. *Crop Science* **15**: 229–232.
- Burson BL. 1985. Cytology of *Paspalum chacoense* and *P. durifolium* and their relationship to *P. dilatatum*. *Botanical Gazette* **146**: 124–129.
- Burson BL. 1991. Genome relationships between tetraploid and hexaploid biotypes of Dallisgrass, *Paspalum dilatatum*. *Botanical Gazette* **152**: 219–223.
- Burson BL. 1992. Cytology and reproductive behaviour of hybrids between *Paspalum urvillei* and two hexaploid *P. dilatatum* biotypes. *Genome* **35**: 1002–1006.
- Burson BL. 1997. Apomixis and sexuality in some *Paspalum* species. *Crop Science* **37**: 1347–1351.
- Burson BL, Bennett HW. 1970a. Cytology, method of reproduction and fertility of Brunswickgrass, *Paspalum nicorae* Parodi. *Crop Science* **10**: 184–187.
- Burson BL, Bennett HW. 1970b. Cytology and reproduction of three *Paspalum* species. *Journal of Heredity* **61**: 129–132.
- Burson BL, Bennett HW. 1971. Chromosome numbers, microsporogenesis, and mode of reproduction of seven *Paspalum* species. *Crop Science* **11**: 292–294.
- Burson BL, Bennett HW. 1976. Cytogenetics of *Paspalum conspersum* and its genomic relationship with yellow-anthered *P. dilatatum* and *P. malacophyllum*. *Canadian Journal of Genetics and Cytology* **18**: 701–708.
- Burson BL, Hussey MA. 1998. Cytology of *Paspalum malacophyllum* and its relationship to *P. jurgensii* and *P. dilatatum*. *International Journal of Plant Sciences* **159**: 153–159.
- Burson BL, Quarín CL. 1982. Cytology of *Paspalum virgatum* and its relationship with *P. intermedium* and *P. jurgensii*. *Canadian Journal of Genetics and Cytology* **24**: 219–226.
- Burson BL, Voigt PW, Evers GW. 1991. Cytology, reproductive behavior and forage potential of hexaploid dallisgrass biotypes. *Crop Science* **31**: 636–641.
- Burson BL, Venuto BC, Hussey MA. 2008. Registration of 'Sabine' Dallisgrass. *Journal of Plant Registration* **3**: 132–137.
- Burton GW. 1948. The method of reproduction in common Bahia grass, *Paspalum notatum*. *Journal of the American Society of Agronomy* **40**: 443–452.
- Burton GW. 1955. Breeding Pensacola bahiagrass, *Paspalum notatum*: I. Method of reproduction. *Agronomy Journal* **47**: 311–314.
- Burton GW. 1992. Manipulating apomixis in *Paspalum*. In: Elgin JH, Miksche JP, eds. *Proceedings of the Apomixis Workshop*. ARS Research Bulletin 104. Washington, DC: USDA-ARS, 16–19.
- Burton GWM, Forbes I. 1960. The genetics and manipulation of obligate apomixis in common Bahia grass (*Paspalum notatum* Flugge). Proceedings of the 8th International Grassland Congress. Reading, 66–71.
- Cáceres ME, Pupilli F, Quarín CL, Arcioni S. 1999. Feulgen-DNA densitometry of embryo sacs permits discrimination between sexual and apomictic plants in *Paspalum simplex*. *Euphytica* **110**: 161–167.
- Cáceres ME, Matzk F, Busti A, Pupilli F, Arcioni S. 2001. Apomixis and sexuality in *Paspalum simplex*: characterization of the mode of reproduction in segregating progenies by different methods. *Sexual Plant Reproduction* **14**: 201–206.
- Calderini O, Chang SB, de Jong H, et al. 2006. Molecular cytogenetics and DNA sequence analysis of an apomixis-linked BAC in *Paspalum simplex* reveal a non pericentromere location and partial microcollinearity with rice. *Theoretical and Applied Genetics* **112**: 1179–1191.
- Calderini O, Donnison I, Polegri L, et al. 2011. Partial isolation of the genomic region linked with apomixis in *Paspalum simplex*. *Molecular Breeding* **28**: 265–276.
- Caponio I, Quarín CL. 1987. El sistema genético de *Paspalum simplex* y de un híbrido interespecífico con *P. dilatatum*. *Kurtziana* **19**: 35–45.
- Caponio I, Quarín CL. 1993. Cytology and reproduction of *P. densum* and its genomic relationship with *P. intermedium* and *P. urvillei*. *Journal of Heredity* **84**: 220–222.
- Capron A, Gourgues M, Neiva LS, et al. 2008. Maternal control of male-gamete delivery in *Arabidopsis* involves a putative GPI-anchored protein encoded by the LORELEI gene. *The Plant Cell* **20**: 3038–3049.
- Carman JG. 1997. Asynchronous expression of duplicate genes in angiosperms may cause apomixis, bispority, tetraspority, and polyembryony. *Biological Journal of the Linnean Society* **61**: 51–94.
- Chao CY. 1974. Megasporeogenesis and megagametogenesis in *Paspalum commersonii* and *P. longifolium* at two polyploid levels. *Botaniska Notiser* **127**: 267–275.
- Chao CY. 1980. Autonomous development of embryo in *Paspalum conjugatum* Berg. *Botaniska Notiser* **133**: 215–222.

- Chase A. 1939. Paspalum of South America. Unpublished manuscript. Hitchcock and Chase Library, Botany Department Smithsonian Institution, Washington DC.
- Crane CF. 2001. Classification of apomictic mechanisms. In: Savidan Y, Carman JG, Dresselhaus T. eds. *The flowering of apomixis: from mechanisms to genetic engineering*. Mexico City: CIMMYT, IRD, European Commission DG VI (FAIR), 24–43.
- Darlington CD. 1939. *Evolution of genetic systems*. Cambridge: Cambridge University Press.
- Daurelio LD, Espinoza F, Quarin CL, Pessino SC. 2004. Genetic diversity in sexual diploid and apomictic tetraploid populations of *Paspalum notatum* situated in sympatry or allopatry. *Plant Systematics and Evolution* **244**: 189–199.
- Denham SS. 2005. Revisión sistemática del subgenero *Harpostachys* de *Paspalum* (Poaceae: Panicoideae: Paniceae). *Annals of the Missouri Botanical Garden* **92**: 463–532.
- Denham SS, Zuloaga FO. 2007. Phylogenetic relationships of the Decumbentes group of *Paspalum*, *Thrasya*, and *Thrasypopsis* (Poaceae: Panicoideae: Paniceae). *Aliso* **23**: 545–562.
- Denham SS, Zuloaga FO, Morrone O. 2002. Systematic revision and phylogeny of *Paspalum* subgenus *Ceresia* (Poaceae: Panicoideae: Paniceae). *Annals of the Missouri Botanical Garden* **89**: 227–399.
- Durán-Figueroa N, Vielle-Calzada JP. 2010. ARGONAUTE9-dependent silencing of transposable elements in pericentromeric regions of *Arabidopsis*. *Plant Signaling and Behavior* **5**: 1476–1479.
- Dwivedi SL, Perotti E, Upadhyaya HD, Ortiz R. 2010. Sexual and apomictic plant reproduction in the genomics era: exploring the mechanisms potentially useful in crop plants. *Sexual Plant Reproduction* **23**: 265–279.
- Ernst A. 1918. *Bastardierung als Ursache der Apogamie im Pflanzenreich*. Jena: Fischer.
- Espinoza F, Quarin CL. 1997. Cytoembryology of *Paspalum chaseanum* and sexual diploid biotypes of two apomictic *Paspalum* species. *Australian Journal of Botany* **45**: 871–877.
- Espinoza F, Urbani MH, Martínez EJ, Quarin CL. 2001. The breeding system of three *Paspalum* species. *Tropical Grassland* **35**: 211–217.
- Essi L, Souza-Chies TT. 2007. Phylogeny of *Linearia* and *Notata* groups of *Paspalum* L. (Poaceae, Panicoideae, Paniceae) and related species. *Genetic Resources and Crop Evolution* **54**: 779–791.
- Evers GW, Burson BL. 2004. Dallisgrass and other *Paspalum* species. In: Moser LE, ed. *Warm-season (C4) grasses*. *Agronomy Monograph* **45**. Madison: ASA, CSSA, and SSSA, 681–713.
- Felitti SA, Seijo JG, González AM, et al. 2011. Expression of lorelei-like genes in aposporous and sexual *Paspalum notatum* plants. *Plant Molecular Biology* **77**: 337–354.
- García-Aguilar M, Michaud C, Leblanc O, Grimanelli D. 2010. Inactivation of a DNA methylation pathway in maize reproductive organs results in apomixis-like phenotypes. *The Plant Cell* **22**: 3249–3267.
- Giussani LM, Zuloaga FO, Quarin CL, Cota-Sánchez H, Ubayasena K, Morrone O. 2009. Phylogenetic relationships in the genus *Paspalum* (Poaceae: Panicoideae: Paniceae): an assessment of the Quadrifaria and Virgata informal groups. *Systematic Botany* **34**: 32–43.
- Goel S, Chen Z, Conner JA, Akiyama Y, Hanna WW, Ozias Akins P. 2003. Delineation by fluorescence *in situ* hybridization of a single hemizygous chromosomal region associated with aposporous embryo sacs formation in *Pennisetum squamulatum* and *Cenchrus ciliaris*. *Genetics* **163**: 1069–1082.
- Gondo T, Tsuruta S, Akashi R, Kawamura O, Hoffmann F. 2005. Green, herbicide-resistant plants by particle inflow gun-mediated gene transfer to diploid bahiagrass (*Paspalum notatum*). *Journal of Plant Physiology* **162**: 1367–1375.
- Grando MF, Franklin CI, Shatters RG. 2002. Optimizing embryogenic callus production and plant regeneration from ‘Tifton 9’ bahiagrass seed explants for genetic manipulation. *Plant Cell, Tissue and Organ Culture* **71**: 213–222.
- Grass Phylogeny Working Group II. 2012. New grass phylogeny resolves deep evolutionary relationships and discovers C4 origins. *New Phytologist* **193**: 304–312.
- Grimanelli D, Leblanc O, Espinosa E, Perotti E, Gonzalez de Leon D, Savidan Y. 1998. Non-Mendelian transmission of apomixis in maize–*Tripsacum* hybrids caused by a transmission ratio distortion. *Heredity* **80**: 40–47.
- Grimanelli D, Leblanc O, Perotti E, Grossniklaus U. 2001. Developmental genetics of gametophytic apomixis. *Trends in Genetics* **17**: 597–604.
- Grimanelli D, García M, Kaszas E, Perotti E, Leblanc O. 2003. Heterochronic expression of sexual reproductive programs during apomictic development in *Tripsacum*. *Genetics* **165**: 1521–1531.
- Grossniklaus U. 2001. From sexuality to apomixis: molecular and genetic approaches. In: Savidan Y, Carman JG, Dresselhaus T. eds. *The flowering of apomixis: from mechanisms to genetic engineering*. Mexico City: CIMMYT, IRD, European Commission DG VI (FAIR), 168–211.
- Guilfoyle TJ, Hagen G. 2007. Auxin response factors. *Current Opinion in Plant Biology* **10**: 453–460.
- Hardwick KG, Lewis MJ, Semenza J, Dean N, Pelham HR. 1990. ERD1 a yeast gene required for the retention of luminal endoplasmic reticulum proteins affects glycoprotein processing in the Golgi apparatus. *EMBO Journal* **9**: 623–630.
- Hojsgaard DH, Schegg E, Valls JFM, Martínez EJ, Quarin CL. 2008. Sexuality, apomixis, ploidy levels, and genomic relationships among four *Paspalum* species of the subgenus *Anachyris* (Poaceae). *Flora* **203**: 535–547.
- Hojsgaard DH, Martínez EJ, Acuña CA, Quarin CL, Pupilli F. 2011. A molecular map of the apomixis-control locus in *Paspalum procurrens* and its comparative analysis with other species of *Paspalum*. *Theoretical and Applied Genetics* **123**: 959–971.
- Hojsgaard DH, Martínez EJ, Quarin CL. 2013. Competition between meiotic and apomictic pathways during ovule and seed development results in clonality. *New Phytologist* **197**: 336–347.
- Hörandl E. 2006. The complex causality of geographical parthenogenesis. *New Phytologist* **171**: 525–538.
- Hörandl E, Hojsgaard DH. 2012. The evolution of apomixis in angiosperms: a reappraisal. *Plant Biosystems* **146**: 681–693.
- Ichimura K, Shinozaki K, Tena G, et al. 2002. Mitogen-activated protein kinase cascades in plants: a new nomenclature. *Trends in Plant Science* **7**: 301–308.
- James VA, Neibaur I, Altpeter F. 2008. Stress inducible expression of the *DREB1A* transcription factor from xeric, *Hordeum spontaneum* L in turf and forage grass (*Paspalum notatum* Flugge) enhances abiotic stress tolerance. *Transgenic Research* **17**: 93–104.
- Jarret RL, Ozias-Akins P, Phatak S, Nadimpalli R, Duncan R, Hiliard S. 1995. DNA contents in *Paspalum* ssp. determined by flow cytometry. *Genetic Resources and Crop Evolution* **42**: 273–242.
- Jia G, Fu Y, He C. 2012. Reversible RNA adenosine methylation in biological regulation. *Trends in Genetics* **29**: 108–115.
- Judziwicz E. 1990. 187. Poaceae. In: Görts-Van Rijn ARA, ed. *Flora of the Guianas, Series A: Phanerogams*, Vol. 8. Königstein: Koeltz Scientific Books, 1–127.
- Kearney M. 2005. Hybridization, glaciations and geographical parthenogenesis. *Trends in Ecology and Evolution* **20**: 495–502.
- Labombarda P, Busti A, Cáceres ME, Quarin CL, Pupilli F, Arcioni S. 2002. An AFLP marker tightly linked to apomixis reveals hemizygoty in a portion of the apomixis-controlling locus in *Paspalum simplex*. *Genome* **45**: 513–519.
- Laspina NV, Vega T, Seijo JG, et al. 2008. Gene expression analysis at the onset of aposporous apomixis in *Paspalum notatum*. *Plant Molecular Biology* **67**: 615–628.
- Lerat E, Sémon M. 2007. Influence of the transposable elements neighbourhood on human gene expression in normal and tumor tissues. *Gene* **396**: 303–311.
- Linnaeus C. 1759. *Systema naturae*, 10th edn. Stockholm.
- Lukowitz W, Roeder A, Parmenter D, Somerville C. 2004. A MAPKK kinase gene regulates extra-embryonic cell fate in *Arabidopsis*. *Cell* **116**: 109–119.
- Lutz W, Sanderson W, Scherbov S. 1997. Doubling of world population unlikely. *Nature* **387**: 803–805.
- Lyttle TW. 1991. Segregation distorters. *Annual Review of Genetics* **25**: 511–557.
- Ma G, Huang X, Zhao N, Xu Q. 2004. Apospory in *Paspalum thunbergii*. *Australian Journal of Botany* **52**: 81–86.
- Ma G, Huang XL, Xu QS, Bunn E. 2009. Multiporate pollen and apomixis in Panicoideae. *Pakistan Journal of Botany* **41**: 2073–2082.
- Marimuthu MP, Jolivet S, Ravi M, et al. 2011. Synthetic clonal reproduction through seeds. *Science* **331**: 876.
- Martelotto LG, Ortiz JPA, Stein J, Espinoza F, Quarin CL, Pessino SC. 2005. A comprehensive analysis of gene expression alterations in a newly synthesized *Paspalum notatum* autotetraploid. *Plant Science* **169**: 211–220.
- Martelotto LG, Ortiz JPA, Stein J, Espinoza F, Quarin CL, Pessino SC. 2007. Genome rearrangements derived from autopolyploidization in *Paspalum* sp. *Plant Science* **172**: 970–977.

- Martínez EJ, Quarin CL, Hayward MD. 1999. Genetic control of apospory in apomictic *Paspalum* species. *Cytologia* 64: 425–433.
- Martínez EJ, Urbani MH, Quarin CL, Ortiz JPA. 2001. Inheritance of apospory in bahiagrass, *Paspalum notatum*. *Hereditas* 135: 19–25.
- Martínez EJ, Hopp HE, Stein J, Ortiz JPA, Quarin CL. 2003. Genetic characterization of apospory in tetraploid *Paspalum notatum* based on the identification of linked molecular markers. *Molecular Breeding* 12: 312–327.
- Martínez EJ, Acuña CA, Hojsgaard DH, Tcach MA, Quarin CL. 2007. Segregation for asexual seed production in *Paspalum* achieved by male gametes of apomictic triploid plants. *Annals of Botany* 100: 1239–1247.
- Matzk F, Meister A, Schubert I. 2000. An efficient screen for reproductive pathways using mature seeds of monocots and dicots. *The Plant Journal* 21: 97–108.
- Morrone O, Denham SS, Aliscioni SS, Zuloaga FO. 2000. Revisión de las especies de *Paspalum* (Panicoideae: Paniceae), subgénero *Anachyris*. *Candollea* 55: 105–135.
- Morrone O, Scatagliani MA, Zuloaga O. 2007. *Cyphonanthus*, a new genus segregated from *Panicum* (Poaceae: Panicoideae: Paniceae) based on morphological, anatomical and molecular data. *Taxon* 56: 521–532.
- Morrone O, Denham SS, Aliscioni SS, Zuloaga FO. 2008. *Parodiophyllochloa*, a new genus segregated from *Panicum* (Paniceae, Poaceae) based on morphological and molecular data. *Systematic Botany* 33: 66–76.
- Nain V, Verma A, Kumar N, Sharma P, Ramesh B, Kumar PA. 2008. Cloning of an ovule-specific promoter from *Arabidopsis thaliana* and expression of beta-glucuronidase. *Indian Journal of Experimental Biology* 46: 207–211.
- Nicora EG, Rúgolo de Agrasar ZE. 1987. *Los géneros de gramíneas de América Austral: Argentina, Chile, Uruguay y áreas limítrofes de Bolivia, Paraguay y Brasil*. Buenos Aires: Editorial Hemisferio Sur.
- Nogler GA. 1982. How to obtain diploid apomictic *Ranunculus auricomus* plants not found in the wild state. *Botanica Helvetica* 92: 13–22.
- Nogler GA. 1984. Gametophytic apomixis. In: Johri BM. ed. *Embryology of angiosperms*. Berlin: Springer, 475–518.
- Norrman GA. 1981. Citología y método de reproducción en dos especies de *Paspalum* (Gramineae). *Bonplandia* 5: 149–158.
- Norrman GA, Quarin CL, Burson BL. 1989. Cytogenetics and reproductive behaviour of different chromosome races in six *Paspalum* species. *Journal of Heredity* 80: 24–28.
- Ochogavía AC, Seijo JG, González MA, et al. 2011. Characterization of retrotransposon sequences expressed in inflorescences of apomictic and sexual *Paspalum notatum* plants. *Sexual Plant Reproduction* 24: 231–246.
- Oliveira RC, Rua GH. 2005. A new species of *Paspalum* (Poaceae, Paniceae) from Central Brazil. *Systematic Botany* 30: 530–532.
- Oliveira RC, Valls JFM. 2009. Duas novas espécies de *Paspalum* L. (Poaceae: Paniceae) do Brasil. *Revista Brasileira de Botânica* 32: 89–94.
- Olmedo-Monfil V, Durán-Figueroa N, Arteaga-Vázquez M, et al. 2010. Control of female gamete formation by a small RNA pathway in *Arabidopsis*. *Nature* 464: 628–632.
- Ozias-Akins P, van Dijk PJ. 2007. Mendelian genetics of apomixis. *Annual Review of Genetics* 41: 509–537.
- Ozias-Akins P, Roche D, Hanna WW. 1998. Tight clustering and hemizygoty of apomixis-linked molecular markers in *Pennisetum squamulatum* implies genetic control of apospory by divergent locus that may have no allelic form in sexual genotypes. *Proceedings of the National Academy of Sciences, USA* 95: 5127–5132.
- Pagliarini MS, Takayama SY, de Freitas PM, et al. 1999. Failure of cytokinesis and 2n gamete formation in Brazilian accessions of *Paspalum*. *Euphytica* 108: 129–135.
- Pagnussat GC, Alandete-Saez M, Bowman JL, Sundaresan V. 2009. Auxin-dependent patterning and gamete specification in the *Arabidopsis* female gametophyte. *Science* 324: 1684–1689.
- Parodi LR. 1969. Estudios sistemáticos sobre las Gramineae-Paniceae argentinas y uruguayas. *Darwiniana* 15: 65–109.
- Pessino SC, Espinoza F, Martínez EJ, Ortiz JPA, Valle EM, Quarin CL. 2001. Isolation of cDNA clones differentially expressed in flowers of apomictic and sexual *Paspalum notatum*. *Hereditas* 134: 35–42.
- Podio M, Rodríguez MP, Felitti S, et al. 2012a. Sequence characterization, *in silico* mapping and cytosine methylation analysis of markers linked to apospory in *Paspalum notatum*. *Genetics and Molecular Biology* 35: 827–837.
- Podio M, Siena LA, Hojsgaard D, Stein J, Quarin CL, Ortiz JPA. 2012b. Evaluation of meiotic abnormalities and pollen viability in aposporous and sexual tetraploid *Paspalum notatum* (Poaceae). *Plant Systematics and Evolution* 298: 1625–1633.
- Polegri L, Calderini O, Arcioni S, Pupilli F. 2010. Specific expression of apomixis-linked alleles revealed by comparative transcriptomic analysis of sexual and apomictic *Paspalum simplex* Morong flowers. *Journal of Experimental Botany* 61: 1869–1883.
- Pritchard AJ. 1962. The cytology and reproduction of *Paspalum yaguaronense*. *Australian Journal of Agricultural Research* 13: 206–211.
- Pritchard AJ. 1970. Meiosis and embryo sac development in *Urochloa mosambicensis* and three *Paspalum* species. *Australian Journal of Agricultural Research* 21: 648–652.
- Pupilli F, Barcaccia G. 2012. Cloning plants by seeds: inheritance models and candidate genes to increase fundamental knowledge for engineering apomixis in sexual crops. *Journal of Biotechnology* 159: 291–311.
- Pupilli F, Cáceres ME, Quarin CL, Arcioni S. 1997. Segregation analysis of RFLP markers reveals a tetrasomic inheritance in apomictic *Paspalum simplex*. *Genome* 40: 822–828.
- Pupilli F, Labombarda P, Cáceres ME, Quarin CL, Arcioni S. 2001. The chromosome segment related to apomixis in *Paspalum simplex* is homoeologous to the telomeric region of the long arm of rice chromosome 12. *Molecular Breeding* 8: 53–61.
- Pupilli F, Martínez EJ, Busti A, Calderini O, Quarin CL, Arcioni S. 2004. Comparative mapping reveals partial conservation of synteny at the apomixis locus in *Paspalum* spp. *Molecular Genetics and Genomics* 270: 539–548.
- Quarin CL. 1992. The nature of apomixis and its origin in Panicoid grasses. *Apomixis Newsletter* 5: 8–15.
- Quarin CL. 1993. Morfología, citología y sistema reproductivo de una nueva especie de gramínea: *Paspalum procurrens*. *Bulletin of the Botanical Society of Argentina* 29: 73–76.
- Quarin CL. 1994. The tetraploid cytotype of *Paspalum durifolium*: cytology, reproductive behavior and its relationship to diploid *P. intermedium*. *Hereditas* 121: 115–118.
- Quarin CL. 1999. Effect of pollen source and pollen ploidy on endosperm formation and seed set in pseudogamous apomictic *Paspalum notatum*. *Sexual Plant Reproduction* 11: 331–335.
- Quarin CL, Burson BL. 1983. Cytogenetic relations among *Paspalum notatum* var. *saurae*, *P. pumilum*, *P. indecorum*, and *P. vaginatum*. *Botanical Gazette* 144: 433–438.
- Quarin CL, Burson BL. 1991. Cytology of sexual and apomictic *Paspalum* species. *Cytologia* 56: 223–228.
- Quarin CL, Caponio I. 1995. Cytogenetics and reproduction of *Paspalum dasypleurum* and its hybrids with *P. urvillei* and *P. dilatatum* ssp. *flavescens*. *International Journal of Plant Sciences* 156: 232–235.
- Quarin CL, Hanna WW. 1980a. Chromosome behavior, embryo sac development, and fertility of *Paspalum modestum*, *P. boscianum*, and *P. conspersum*. *Journal of Heredity* 71: 419–422.
- Quarin CL, Hanna WW. 1980b. Effect of three ploidy levels on meiosis and mode of reproduction in *Paspalum hexastachyum*. *Crop Science* 20: 69–75.
- Quarin CL, Norrmann GA. 1987. Cytology and reproductive behavior of *Paspalum equitans*, *P. ionanthum*, and their hybrids with diploid and tetraploid cytotypes of *P. cromyorrhizon*. *Botanical Gazette* 148: 386–391.
- Quarin CL, Urbani MH. 1990. Cytology and reproduction of diploid and tetraploid cytotypes of *Paspalum coryphaeum*. *Apomixis Newsletter* 2: 44–46.
- Quarin CL, Hanna WW, Fernández A. 1982. Genetic studies in diploid and tetraploid *Paspalum* species. Embryo sac development, chromosome behavior, and fertility in *P. cromyorrhizon*, *P. laxum*, and *P. proliferum*. *Journal of Heredity* 73: 254–256.
- Quarin CL, Burson BL, Burton GW. 1984. Cytology of intra- and interspecific hybrids between two cytotypes of *Paspalum notatum* and *P. cromyorrhizon*. *Botanical Gazette* 145: 420–426.
- Quarin CL, Norrmann GA, Urbani MU. 1989. Polyploidization in aposporous *Paspalum* species. *Apomixis Newsletter* 1: 28–29.
- Quarin CL, Pozzobon MT, Valls JFM. 1996. Cytology and reproductive behaviour of diploid, tetraploid and hexaploid germplasm accessions of a wild forage grass: *Paspalum compressifolium*. *Euphytica* 9: 345–349.
- Quarin CL, Valls JFM, Urbani MH. 1997. Cytological and reproductive behaviour of *Paspalum atratum*, a promising forage grass for the tropics. *Tropical Grasslands* 31: 114–116.
- Quarin CL, Norrmann GA, Espinoza F. 1998. Evidence for autopolyploidy in apomictic *Paspalum rufum*. *Hereditas* 129: 119–124.
- Quarin CL, Espinoza F, Martínez EJ, Pessino SC, Bovo OA. 2001. A rise of ploidy level induces the expression of apomixis in *Paspalum notatum*. *Sexual Plant Reproduction* 13: 243–249.

- Quarin CL, Urbani MH, Blount AR, et al. 2003. Registration of Q4188 and Q4205, sexual tetraploid germplasm lines of bahiagrass. *Crop Science* 43: 745–746.
- Quesenberry KH, Dampier JM, Lee YY, Smith RL, Acuña CA. 2010. Doubling the chromosome number of bahiagrass via tissue culture. *Euphytica* 175: 43–50.
- Ramos DM, Valls JFM, Oliveira RC, Graciano-Ribeiro D. 2011. A new awned species of *Paspalum* (Poaceae, Panicoideae, Paniceae) from Brazil. *Novon* 21: 368–372.
- Ravi M, Marimuthu MPA, Siddiqi I. 2008. Gamete formation without meiosis in Arabidopsis. *Nature* 451: 1121–1124.
- Rebozzio RN, Sartor ME, Quarin CL, Espinoza F. 2011. Residual sexuality and its seasonal variation in natural apomictic *Paspalum notatum* accessions. *Biologia Plantarum* 55: 391–395.
- Rebozzio RN, Rodríguez MP, Stein J, Ortiz JPA, Quarin CL, Espinoza F. 2012. Validation of molecular markers linked to apospory in tetraploid races of bahiagrass, *Paspalum notatum* Flüggé. *Molecular Breeding* 29: 189–198.
- Renner O. 1916. Zur Terminologie des pflanzlichen Generationswechsels. *Biologisches Zentralblatt* 36: 337–374.
- Roche D, Chen Z, Hanna WW, Ozias-Akins P. 2001. Non-Mendelian transmission of an apospory-specific genomic region in a reciprocal cross between sexual pearl millet (*Pennisetum glaucum*) and an apomictic F1 (*P. glaucum* × *P. squamulatum*). *Sexual Plant Reproduction* 13: 217–223.
- Roche D, Conner JA, Budiman MA, et al. 2002. Construction of BAC libraries from two apomictic grasses to study the microcollinearity of their apospory-specific genomic regions. *Theoretical and Applied Genetics* 104: 804–812.
- Rodríguez MP, Cervigni GDL, Quarin CL, Ortiz JPA. 2012. Frequencies and variation in cytosine methylation patterns in diploid and tetraploid cytotypes of *Paspalum notatum*. *Biologia Plantarum* 56: 276–282.
- Rua GH, Valls JFM, Graciano-Ribeiro D, Oliveira RC. 2008. Four new species of *Paspalum* (Poaceae, Paniceae) from Central Brazil, and resurrection of an old one. *Systematic Botany* 33: 267–276.
- Rua GH, Speranza PR, Vaio M, Arakaki M. 2010. A phylogenetic analysis of the genus *Paspalum* (Poaceae) based on cpDNA and morphology. *Plant Systematics and Evolution* 288: 227–243.
- Sabelli PA, Larkins BA. 2009. The development of endosperm in grasses. *Plant Physiology* 149: 14–26.
- Sánchez-Ken JG. 2010. Two new species of *Paspalum* (Paniceae: Panicoideae: Poaceae), a preliminary checklist of the genus in Mexico, and the identity of *P. crinitum*. *Revista Mexicana de Biodiversidad* 81: 629–647.
- Sandhu S, Altpeter F, Blount AR. 2007. Apomictic bahiagrass expressing the bar gene is highly resistant to glufosinate under field conditions. *Crop Science* 47: 1691–1697.
- Sandhu S, James VA, Quesenberry KH, Altpeter F. 2009. Risk assessment of transgenic apomictic tetraploid bahiagrass cytogenetics, breeding behavior and performance of intra-specific hybrids. *Theoretical and Applied Genetics* 119: 1383–1395.
- Sandhu S, Blount AR, Quesenberry KH, Altpeter F. 2010. Apomixis and ploidy barrier suppress pollen-mediated gene flow in field grown transgenic turf and forage grass (*Paspalum notatum* Flüggé). *Theoretical and Applied Genetics* 121: 919–929.
- Sartor ME, Quarin CL, Espinoza F. 2009. Mode of reproduction of colchicine-induced *Paspalum plicatulum* tetraploids. *Crop Science* 49: 1270–1276.
- Sartor ME, Quarin CL, Urbani MH, Espinoza F. 2011. Ploidy levels and reproductive behaviour in natural populations of five *Paspalum* species. *Plant Systematics and Evolution* 293: 31–41.
- Savidan Y. 2001. Transfer of apomixis through wide crosses. In: Savidan Y, Carman JG, Dresselhaus T. eds. *The flowering of apomixis: from mechanisms to genetic engineering*. Mexico: Centro Internacional de Mejoramiento de Maíz y Trigo (CIMMYT), 153–167.
- Schatlowski N, Kölher C. 2012. Tearing down barriers: understanding the molecular mechanisms of interploidy by hybridization. *Journal of Experimental Botany* 63: 6059–6067.
- Sede SM, Morrone O, Giussani LM, Zuloaga FO. 2008. Phylogenetic studies in Paniceae (Poaceae): a realignment of section Lorea of *Panicum*. *Systematic Botany* 33: 284–300.
- Sede SM, Zuloaga FO, Morrone O. 2009. Phylogenetic studies in the Paniceae (Poaceae-Panicoideae); *Ocellochloa*, a new genus from the New World. *Systematic Botany* 34: 684–693.
- Sharbel TF, Voigt ML, Corral JM, et al. 2010. Apomictic and sexual ovules of *Boecheera* display heterochronic global gene expression patterns. *The Plant Cell* 22: 655–671.
- Siena LA, Sartor ME, Espinoza F, Quarin CL, Ortiz JPA. 2008. Genetic and embryological evidences of apomixis at the diploid level in *Paspalum rufum* support recurrent auto-polyploidization in the species. *Sexual Plant Reproduction* 21: 205–215.
- Singh M, Goel S, Meeley RB, et al. 2011. Production of viable gametes without meiosis in maize deficient for an ARGONAUTE protein. *The Plant Cell* 23: 443–458.
- Smith RL, Grando MF, Li YY, Seib JC, Shatters RG. 2002. Transformation of bahiagrass (*Paspalum notatum* Flüggé). *Plant Cell Reports* 20: 1017–1021.
- Snyder LA. 1957. Apomixis in *Paspalum secans*. *American Journal of Botany* 44: 318–324.
- Snyder LA. 1961. Asynesis and meiotic non-reduction in microsporogenesis of apomictic *Paspalum secans*. *Cytologia* 26: 50–61.
- Souza-Chies LE, Rua GH, Valls JFM, Rogéria B, Miz RB. 2006. A preliminary approach to the phylogeny of the genus *Paspalum* (Poaceae). *Genetica* 126: 1–2.
- Spain BH, Koo D, Ramakrishnan M, Dzudzor B, Colicelli J. 1995. Truncated forms of a novel yeast protein suppress the lethality of a G protein alpha subunit deficiency by interacting with the beta subunit. *Journal of Biological Chemistry* 270: 25435–25444.
- Speranza PR. 2009. Evolutionary patterns in the Dilatata group (*Paspalum*, Poaceae). *Plant Systematics and Evolution* 282: 43–56.
- Stebbins GL. 1941. Apomixis in angiosperms. *Botanical Review* 7: 507–542.
- Stebbins GL. 1950. *Variation and evolution in plants*. New York: Columbia University Press.
- Stein J, Quarin CL, Martínez EJ, Pessino SC, Ortiz JPA. 2004. Tetraploid races of *Paspalum notatum* show polysomic inheritance and preferential chromosome pairing around the apospory-controlling locus. *Theoretical and Applied Genetics* 109: 186–191.
- Stein J, Pessino SC, Martínez EJ, et al. 2007. A genetic map of tetraploid *Paspalum notatum* Flüggé (bahiagrass) based on single-dose molecular markers. *Molecular Breeding* 20: 153–166.
- Stevens PF. 2001. (onwards) Angiosperm Phylogeny Website. Version 12, July 2012. <http://www.mobot.org/MOBOT/research/APweb/>.
- Urbani MH. 1996. Estudios sobre citología, sistema reproductivo y compatibilidad polen–pistilo de *Panicum dichotomiflorum* y *Paspalum fasciculatum* (Gramineae:Paniceae). *Darwiniana* 34: 193–198.
- Urbani MH, Quarin CL, Espinoza F, Penteadio MIO, Rodrigues IF. 2002. Cytogeography and reproduction of the *Paspalum simplex* polyploid complex. *Plant Systematics and Evolution* 236: 99–105.
- Vielle-Calzada JP, Crane CF, Stelly DM. 1996. Apomixis: the asexual revolution. *Science* 274: 1332–1333.
- Vinkenoog R, Spielman M, Adams S, Fischer RL, Dickinson HG, Scott RJ. 2000. Hypomethylation promotes autonomous endosperm development and rescues postfertilization lethality in *fie* mutants. *The Plant Cell* 12: 2271–2282.
- Vogel KP, Burson BL. 2004. Breeding and genetics. In: Moser LE, Burson BL, Sollenberger LE. eds. *Warm-season (C4) grasses. Agronomy Monograph* 45. Madison: ASA, CSSA, SSSA, 51–94.
- Williams WM, Williamson ML, Real D. 2011. *Paspalum* In: Kole C. ed. *Wild crop relatives: Genomic and breeding resources: Millets and grasses*. Berlin: Springer, 197–215.
- Yu HJ, Hogan P, Sundaresan V. 2005. Analysis of the female gametophyte transcriptome of *Arabidopsis* by comparative expression profiling. *Plant Physiology* 139: 1853–1869.
- Zhong S, Li H, Bodi Z, et al. 2008. MTA is an *Arabidopsis* messenger RNA adenosine methylase and interacts with a homolog of a sex-specific splicing factor. *The Plant Cell* 20: 1278–1288.
- Zuloaga FO, Morrone O. 2005. Revisión de las especies de *Paspalum* para América del Sur austral. *Annals of the Missouri Botanical Garden; Monographs in Systematic Botany* 102: 1–297.
- Zuloaga FO, Giussani L, Morrone O. 2007. *Hopia*, a new monotypic genus segregated from *Panicum* (Poaceae). *Taxon* 56: 145–156.
- Zuloaga FO, Scataglieni MA, Morrone O. 2010. A phylogenetic evaluation of *Panicum* sects. Agrostoidae, Megista, Prionita and Tenera (Panicoideae, Poaceae): two new genera, *Stephostachys* and *Sorengia*. *Taxon* 59: 1535–1546.
- Zuloaga FO, Morrone O, Scataglieni MA. 2011. Monograph of *Trichanthecium*, a new genus segregated from *Panicum* (Poaceae, Paniceae) based on morphological and molecular data. *Systematic Botany Monographs* 94.
